# Supplementary material for: Species extinction risk is shaped by proteome-level amino acid composition and selective codon usage
Source: Research Square preprint supplement (doi:10.21203/rs.3.rs-8533040/v1), 2026-02-13
Supplement: Supplementary file 1 [file 099b3567f7c414e1aa5b4e5a.xlsx]

## Sheet: Sheet1
Supplimentary S2( Table 1 ):-protein sequence data of Endangered Species and their homologous normal Species and Extremo species
protein name	organism name	extinct	organism name	normal	organism name	acidic	organism name	alkaline	organism name	thermo
RNA polymerase 2 largest subunit	ERIODERMA PEDICELLATUM	A0A023IMZ7	Pseudocyphellaria aurata	D3IVY3	Arabidopsis thaliana	Q5YDB5
Phosphoenolpyruvate carboxykinase	Bombus brachycephalus	A5JDX4	Bombus perezi	M4IZ72					Thermococcus kodakarensis	Q6F494
Arginine kinase	Bombus inexspectatus	C7SEQ3	Bombus velox	I6LHL9	Bacillus subtilis (strain 168)	P39155
NADH-ubiquinone oxidoreductase chain 5	Ornithoptera alexandrae"	Q9G6L5	Ornithoptera priamus	Q9TE37	Arabidopsis thaliana	Q9SKT7
Cytochrome c oxidase subunit 1	Ornithoptera croesus	A0A0S2RSU9	Troides cuneifera cuneifera	A0A0S2RSY8	Gluconobacter oxydans (strain 621H)	Q47945
Histone H3	Chrysoritis dicksoni"	A0A089YL01	HUMAN	P62807			Saccharomyces cerevisiae (strain ATCC 204508)	Q04089
Cytochrome b	Montipora dilatata	F2WTV8	Montipora digitata	D3G8H9	Gluconobacter oxydans (strain 621H)	Q47945	Thauera butanivorans (strain ATCC 43655)	Q9AF95	Thauera butanivorans (strain ATCC 43655	Q9AF95
NADH dehydrogenase subunit	Pocillopora fungiformis	A0A1W6RZD5	Pocillopora acuta	A0A1W6RZD7	Arabidopsis thaliana	Q9SKT7	Lactococcus lactis subsp. cremoris (strain MG1363)	P54322
Solute carrier family 8 member 3	Cryptotriton alvarezdeltoroi	A0A0K0VPY0	Cryptotriton monzoni	A0A0K0VPX5	Homo sapiens	Q96NT5

## Sheet: AAS composition
Supplimentary S2( Table 2 ):-Amino acid compisition data of endangered Species
Ala	Cys	Asp	Glu	Phe	Gly	His	Ile	Lys	Leu	Met	Asn	Pro	Gln	Arg	Ser	Thr	Val	Trp	Tyr
3.43643	0	0	0	2.16216	4.811	0	3.5503	0	3.93701	0	0.917431	0	1.03093	0	2.3622	0	4.12371	0	1.5748		end	Ala	3.43643	3.62694	4.14201	4.86486	5.31697	5.78066	7.69231	8.01527	8.66142	12.844
3.62694	0	2.07254	0.687285	3.66972	5.50459	0	3.66972	1.02249	7.02703	0.917431	1.77515	1.71821	1.5544	1.03093	4.86486	2.7027	4.49898	0	1.62162			Cys	0	0	0.408998	0.917431	1.03093	1.0805	1.18343	1.5748	1.9084	2.7027
4.14201	0.408998	2.75229	1.84049	5.34351	5.69948	1.03093	5.72519	1.5544	8.39695	1.18343	2.67176	2.67176	1.5748	1.43149	5.34351	2.74914	4.58716	0	2.75229			Asp	0	2.07254	2.75229	2.86299	3.43643	4.53809	5.51181	5.72519	8.10811	9.46746
4.86486	0.917431	2.86299	2.59067	5.51181	5.72519	1.77515	7.02703	3.43643	10.0592	2.07254	3.10881	4.58716	1.84049	2.36686	5.50459	3.43511	4.72441	0.687285	3.06748			Glu	0	0.687285	1.84049	2.59067	3.94381	5.50459	5.51181	6.48855	7.56757	7.69231
5.31697	1.03093	3.43643	3.94381	7.10059	7.18531	1.83486	7.08661	4.91626	10.0917	3.14961	3.84615	4.59211	2.48514	3.10881	7.13128	3.62694	4.86486	1.52672	3.84615			Phe	2.16216	3.66972	5.34351	5.51181	7.10059	7.29335	7.97546	8.93471	12.4352	19.2308
5.78066	1.0805	4.53809	5.50459	7.29335	7.56757	2.16216	7.94165	7.08661	11.7774	3.78378	4.21394	4.73373	2.7027	3.51162	7.25389	4.75419	5.78066	1.62162	3.99784			Gly	4.811	5.50459	5.69948	5.72519	7.18531	7.56757	7.69231	8.58896	9.46746	10.2362
7.69231	1.18343	5.51181	5.51181	7.97546	7.69231	2.32307	8.59107	8.28402	12.0654	4.19847	4.86486	5.31697	3.5503	4.96183	7.69231	5.91716	5.91716	1.67477	4.14201			His	0	0	1.03093	1.77515	1.83486	2.16216	2.32307	3.05344	3.10881	3.47648
8.01527	1.5748	5.72519	6.48855	8.93471	8.58896	3.05344	8.80829	8.39695	14.5078	5.07834	4.90798	5.51181	3.84615	5.51181	8.79346	5.93047	7.63359	2.59067	4.58015			Ile	3.5503	3.66972	5.72519	7.02703	7.08661	7.94165	8.59107	8.80829	11.2474	11.5385
8.66142	1.9084	8.10811	7.56757	12.4352	9.46746	3.10881	11.2474	9.18919	19.5876	6.74847	6.18557	6.21762	4.19847	6.48649	9.27835	6.42202	7.69231	2.65849	5.18135			Lys	0	1.02249	1.5544	3.43643	4.91626	7.08661	8.28402	8.39695	9.18919	10.0917
12.844	2.7027	9.46746	7.69231	19.2308	10.2362	3.47648	11.5385	10.0917	23.0769	10.9966	7.08661	8.10811	5.50459	11.9266	11.5385	10.2362	10.8808	3.14961	7.21649			Leu	3.93701	7.02703	8.39695	10.0592	10.0917	11.7774	12.0654	14.5078	19.5876	23.0769
																						Met	0	0.917431	1.18343	2.07254	3.14961	3.78378	4.19847	5.07834	6.74847	10.9966
Supplimentary S2( Table 3 ):-Amino acid compisition data of Normal Species																						Asn	0.917431	1.77515	2.67176	3.10881	3.84615	4.21394	4.86486	4.90798	6.18557	7.08661
Ala	Cys	Asp	Glu	Phe	Gly	His	Ile	Lys	Leu	Met	Asn	Pro	Gln	Arg	Ser	Thr	Val	Trp	Tyr			Pro	0	1.71821	2.67176	4.58716	4.59211	4.73373	5.31697	5.51181	6.21762	8.10811
3.42466	0	0	0	1.53846	4.79452	0	3.42857	0	3.7594	0	2.28571	0	1.0274	0	3.00752	0	4.09357	0	1.50376			Gln	1.03093	1.5544	1.5748	1.84049	2.48514	2.7027	3.5503	3.84615	4.19847	5.50459
3.92157	0	2.38095	0.684932	1.5873	5.55556	0	4.7619	1.16959	4.7619	1.14286	2.38095	2.05479	1.50376	1.0274	4.10256	3.43511	4.10959	0	1.53846			Arg	0	1.03093	1.43149	2.36686	3.10881	3.51162	4.96183	5.51181	6.48649	11.9266
4.57143	0	2.45098	1.47059	5.26316	5.72519	1.0274	5.64103	1.47059	5.12821	2.38095	2.67176	2.67176	1.75439	1.55945	5.34351	3.76712	4.51128	0.571429	3.11891			Ser	2.3622	4.86486	5.34351	5.50459	7.13128	7.25389	7.69231	8.79346	9.27835	11.5385
5.26316	0.194932	2.92398	1.75439	5.34351	7.35294	1.71429	5.72519	4.10959	8.39695	2.45098	3.43137	4.72482	1.96078	2.85714	6.85714	4.41176	5.64103	0.684932	3.42857			Thr	0	2.7027	2.74914	3.43511	3.62694	4.75419	5.91716	5.93047	6.42202	10.2362
5.919	1.0274	3.42466	3.89408	6.95742	7.58048	2.33645	6.76692	5.19211	9.14286	3.00752	3.84615	4.7619	2.33645	2.94118	7.21703	4.61538	5.71429	1.52672	3.84615			Val	4.12371	4.49898	4.58716	4.72441	4.86486	5.78066	5.91716	7.63359	7.69231	10.8808
6.66667	1.03842	4.41329	5.26316	7.42857	7.69231	2.38095	7.19178	6.76692	11.0592	3.58974	4.36137	5.06823	2.38095	3.32295	7.84314	5.29595	5.97092	1.53846	3.89408			Trp	0	0	0	0.687285	1.52672	1.62162	1.67477	2.59067	2.65849	3.14961
7.69231	1.50376	5.26316	5.55556	8.21918	8.20513	2.5641	7.35294	7.17949	12.2807	4.19847	4.87329	5.14286	3.07692	4.96183	8.21918	6.04288	7.14286	1.86916	3.96825			Tyr	1.5748	1.62162	2.75229	3.06748	3.84615	3.99784	4.14201	4.58015	5.18135	7.21649
8.01527	1.71429	5.72519	6.48855	8.577	8.96686	2.94118	7.47664	8	12.7451	5.14019	5.12821	6.01504	3.42857	6.01504	8.577	6.28571	7.63359	2.72904	4.41176
9.02256	1.9084	7.17949	7.42857	10.7843	9.71429	3.05344	11.306	8.39695	20.2055	6.43275	6.16438	6.37255	3.84615	6.34921	11.1111	6.34921	7.69231	3.00752	4.58015		nor	Ala	3.42466	3.92157	4.57143	5.26316	5.919	6.66667	7.69231	8.01527	9.02256	10.3175
10.3175	3.07692	9.14286	8.71795	19.2308	10.5263	3.31384	11.5385	15.873	23.0769	11.6438	6.76692	8.20513	4.19847	6.66667	11.5385	10.5263	11.7647	3.92157	7.19178			Cys	0	0	0	0.194932	1.0274	1.03842	1.50376	1.71429	1.9084	3.07692
																						Asp	0	2.38095	2.45098	2.92398	3.42466	4.41329	5.26316	5.72519	7.17949	9.14286
																						Glu	0	0.684932	1.47059	1.75439	3.89408	5.26316	5.55556	6.48855	7.42857	8.71795
																						Phe	1.53846	1.5873	5.26316	5.34351	6.95742	7.42857	8.21918	8.577	10.7843	19.2308
																						Gly	4.79452	5.55556	5.72519	7.35294	7.58048	7.69231	8.20513	8.96686	9.71429	10.5263
																						His	0	0	1.0274	1.71429	2.33645	2.38095	2.5641	2.94118	3.05344	3.31384
																						Ile	3.42857	4.7619	5.64103	5.72519	6.76692	7.19178	7.35294	7.47664	11.306	11.5385
																						Lys	0	1.16959	1.47059	4.10959	5.19211	6.76692	7.17949	8	8.39695	15.873
																						Leu	3.7594	4.7619	5.12821	8.39695	9.14286	11.0592	12.2807	12.7451	20.2055	23.0769
																						Met	0	1.14286	2.38095	2.45098	3.00752	3.58974	4.19847	5.14019	6.43275	11.6438
Supplimentary S2( Table 4 ):-Amino acid compisition data of Extremophilic Species																						Asn	2.28571	2.38095	2.67176	3.43137	3.84615	4.36137	4.87329	5.12821	6.16438	6.76692
Ala	Cys	Asp	Glu	Phe	Gly	His	Ile	Lys	Leu	Met	Asn	Pro	Gln	Arg	Ser	Thr	Val	Trp	Tyr			Pro	0	2.05479	2.67176	4.72482	4.7619	5.06823	5.14286	6.01504	6.37255	8.20513
3.43643	0.642055	1.96078	3.13808	2.57235	4.811	0.96463	3.48584	2.39651	6.48536	1.5919	1.96078	3.33333	1.28411	1.92926	3.21027	3.63636	5.15464	0	2			Gln	1.0274	1.50376	1.75439	1.96078	2.33645	2.38095	3.07692	3.42857	3.84615	4.19847
5.61798	1.01302	4.18006	3.13808	2.92887	5.71429	1.71821	3.61795	4.1841	6.48536	1.5919	3.33333	3.78007	1.98347	3.9749	3.85852	4.17335	5.95041	0.321543	2.14876			Arg	0	1.0274	1.55945	2.85714	2.94118	3.32295	4.96183	6.01504	6.34921	6.66667
6.18557	1.01302	5.32646	3.26797	2.92887	6	1.73661	3.61795	4.1841	6.5123	1.71821	3.47107	3.78007	2.57235	3.9749	4.29752	4.18006	6.06695	0.343643	2.20779			Ser	3.00752	4.10256	5.34351	6.85714	7.21703	7.84314	8.21918	8.577	11.1111	11.5385
6.18557	1.20275	5.32646	4.48625	3.50649	7.54414	1.73661	4.1841	4.48625	6.5123	1.89003	3.76266	4.63918	2.85714	4.3573	5.06512	5.15464	6.06695	0.909091	2.2508			Thr	0	3.43511	3.76712	4.41176	4.61538	5.29595	6.04288	6.28571	6.34921	10.5263
7.27273	1.20275	5.33333	4.48625	3.61795	7.73196	1.81818	4.1841	4.48625	7.93388	1.89003	3.76266	4.81541	2.92887	4.95868	5.06512	5.15464	6.42055	1.37457	3.05011			Val	4.09357	4.10959	4.51128	5.64103	5.71429	5.97092	7.14286	7.63359	7.69231	11.7647
8.21194	1.25523	5.45455	5.49828	3.61795	7.73196	1.89003	4.28571	4.95868	8.0756	2.39651	4.12371	5.01089	2.92887	4.98282	6.27615	5.22876	6.66667	1.37457	3.09278			Trp	0	0	0.571429	0.684932	1.52672	1.53846	1.86916	2.72904	3.00752	3.92157
8.66667	1.25523	5.65553	5.984	3.78007	8.061	1.89003	4.29752	5.45455	8.0756	2.4077	4.12371	5.984	2.94202	5.12711	6.27615	5.33333	6.97168	1.52505	3.09278			Tyr	1.50376	1.53846	3.11891	3.42857	3.84615	3.89408	3.96825	4.41176	4.58015	7.19178
9.2562	1.29963	5.77849	6.10932	4.18452	8.36013	2.17865	4.78435	5.99829	8.52614	2.47072	4.34162	6.77686	3.03907	5.49828	6.35533	5.39846	7.08369	1.81377	3.13808
9.26194	1.32231	5.78871	6.52921	4.46281	8.49757	2.18509	5.32646	6.66667	8.83117	2.64463	4.60251	6.90377	3.03907	5.49828	6.66667	5.6701	7.27273	2.24719	3.13808
9.26194	1.33333	5.78871	6.52921	4.66667	9.2562	2.4077	5.32646	7.07395	8.98876	2.66667	4.60251	6.90377	3.48584	5.61798	7.62527	5.85774	7.56014	2.30126	3.15624
11.0879	1.52505	6.18557	7.60331	4.97592	10.8787	2.71967	5.33333	8.1862	9.10653	2.98701	4.67532	7.07395	3.60825	5.78871	7.90378	5.85774	7.56014	2.30126	3.61795
11.0879	1.60772	6.90377	7.92208	5.49828	10.8787	2.71967	6.09952	8.24742	9.32476	3.21543	4.81541	7.4026	3.60825	5.78871	7.90378	6.28099	8.53835	2.74964	3.61795
11.329	1.71821	6.90377	8	5.49828	11.1433	3.37662	6.52921	8.24742	10	4.1841	5.78778	7.52533	3.78007	6	8.05195	6.65702	8.53835	2.74964	4.17335
11.8971	1.94805	7.27273	10.5939	6.31808	11.1433	4	7.71704	9.62199	17.8649	4.1841	7.04467	7.52533	4	6.23377	9.96564	6.65702	9.00322	3.30579	4.29553

## Sheet: Sheet3
Supplimentary S2( Table 5 ):- % Of Hydrophobicity data of Endanger species and their homologues Normal and Extremophilic Species
% OF HYDROPHOBICITY (Stress condition protein)	% OF HYDROPHOBICITY (Normal)	% OF HYDROPHOBICITY (Endanger)
42.47	37.95	39.92
44.63	41.73	42.06
44.33	37.1	36.69
39.69	57.53	58.08
44.14	55.75	55.83
34.71	35.71	40.37
44.14	59.31	61.14
39.69	69.23	69.23
54.9	43.51	43.51
Supplimentary S2( Table 5 ):- % Of Hydrophilicity data of Endanger species and their homologues Normal and Extremophilic Species
% OF HYDROPHILICITY (Stress condition protein )	% OF HYDROPHILICITY (Normal)	% OF HYDROPHILICITY (Endanger)
41	42	44
35	35	34
40	40	41
41	25	25
32	23	23
47	42	46
32	21	22
41	19	19
25	38	38
Supplimentary S2( Table 5 ):- Isoelectri point data of Endanger species and their homologues Normal and Extremophilic Species
ISOELECTRIC POINT (Stress condition protein)	ISOELECTRIC POINT(Normal)	ISOELECTRIC POINT( Endanger)
6.1	5.7	7.1
4.6	8.9	8.2
6.7	4.5	4.5
9.2	8.6	7.9
5.8	5.9	5.8
9.4	11.3	10.8
5.8	7.9	9
9.2	5.9	5.9
8.9	8.4	8.4
