# Supplementary material for: Species extinction risk is shaped by proteome-level amino acid composition and selective codon usage
Source: Research Square preprint supplement (doi:10.21203/rs.3.rs-8533040/v1), 2026-02-13
Supplement: Supplementary file 2 [file 4363c2100b343436c860c950.xlsx]

## Sheet: proteins details
Supplimentary S1( Table 1 ):-protein sequence data of Endangered Insect Species and their homologous normal Species
NAME OF THE SPECIES	PROTEIN NAME	Year of extinct or Endangered	UNIPORTid	LENGTH	NORMAL UNIPORTid	Normal ORGANISM NAME	Length
Bombus brachycephalus	Phosphoenolpyruvate carboxykinase	1888	A5JDX4	127	M4IZ72	Bombus perezi	127
Bombus crotchii	Phosphoenolpyruvate carboxykinase	1878	A5JDW7	127	A5JDU5	Bombus affinis	127
Bombus inexspectatus	Arginine kinase	1963	C7SEQ3	169	I6LHL9	Bombus velox	175
Bombus inexspectatus	Phosphoenolpyruvate carboxykinase	1963	C7SEQ2	116	A5JE72	Bombus borealis	117
Bombus inexspectatus	Long-wavelength rhodopsin	1963	C7SEQ5	153	I6LGQ2	Bombus norvegicus	167
Bombus inexspectatus	Elongation factor 1-alpha	1963	C7SEQ4	176	Q86CH1	Bombus ruderarius	173
Bombus steindachneri"	Phosphoenolpyruvate carboxykinase	1888	A5JE38	127	A5JE40	Bombus atratus	127
Ornithoptera alexandrae"	NADH-ubiquinone oxidoreductase chain 5	1907	Q9G6L5	291	Q9TE37	Ornithoptera priamus	292
"Ornithoptera croesus"	Cytochrome c oxidase subunit 1	1859	A0A0S2RSU9	492	A0A0S2RSY8	Troides cuneifera cuneifera	516
Ornithoptera croesus	NADH-ubiquinone oxidoreductase chain 5	1859	Q9TE39	291	Q9TE36	Ornithoptera victoriae	292
Ornithoptera croesus	Protein Wnt	1859	A0A0S2RTG8	144	A0A0S2RTU9	Ornithoptera goliath supremus	149
"Ornithoptera meridionalis"	NADH-ubiquinone oxidoreductase chain 5	1897	Q9G6L4	291	Q9TE40	Troides helena	292
Papilio aristophontes"	Engrailed	1897	A0A023ULN6	152	A0A023ULI7	Papilio lormieri	156
Papilio aristophontes"	Invected	1897	A0A023UME5	109	A0A023ULV3	Papilio nireus	109
"Acrodipsas illidgei"	Cytochrome c oxidase subunit 1	1914	Q8SF36	194	Q8SF33	Acrodipsas mortoni	194
Acrodipsas illidgei	Cytochrome c oxidase subunit 2	1914	Q8SF19	186	Q8SF17	Acrodipsas mortoni	190
Chrysoritis dicksoni"	Cytochrome c oxidase subunit 1	1947	A0A089WYM8	397	G3KFA8	Curetis barsine	398
Chrysoritis dicksoni"	Histone H3	1947	A0A089YL01	109	P62807	HUMAN	126
Chrysoritis dicksoni"	Carbamoylphosphate synthetase	1947	A0A089WZK6	216	A0A0C4ZMW3	Allotinus leogoron leogoron	212
Chrysoritis dicksoni"	Elongation factor 1 alpha	1947	A0A089YLU8	358	D1GKP8	Caledopsyche cerberus	366
Paralucia spinifera"	Cytochrome c oxidase subunit 1	1978	S5XBR7	219	A6N2J0	Lethe confusa	221
"Polyommatus dama"	Cytochrome c oxidase subunit 1	1892	Q2VX75	229	Q64IC3	Polyommatus paulae	229
"polyommatus humedasae"	Cytochrome c oxidase subunit 1	1976	D9IWG3	498	P50668	Choristoneura biennis	513
Polymmatus humedasae	Cytochrome c oxidase subunit 2	1976	D9IWG2	225	Q4G1T4	Polyommatus demavendi	225
Gonepteryx maderensis"	Cytochrome c oxidase subunit 1	1862	O79141	105	A0A0H4T2M3	Polyura nepenthes	113
Ocybadistes knightorum"	Cytochrome c oxidase subunit 1	1994	S5WZB2	219	A6N2J0	Lethe confusa	221
Pieris cheiranthi"	Cytochrome c oxidase subunit 1	1808	B0LI48	210	Q2VXL5	Aricia agestis	213
Tinostoma smaragditis"	Cytochrome c oxidase subunit 1	1894	G5DQZ9	219	A0A067ZCG9	Daphnis placida	217
Pararge xiphia"	Protein Wnt	1775	Q2Q825	132	Q2Q822	Pararge xiphioides	133
Pararge xiphia"	NADH-ubiquinone oxidoreductase chain 1	1775	Q9MKU7	151	Q9MKV3	Hipparchia neomiris	151
Pararge xiphia"	Cytochrome c oxidase subunit 1	1775	Q2Q800	483	L7SUB5	Anisoplaca achyrota	491
Supplimentary S1( Table 2 ):-protein sequence data of Endangered Species Mollusca and their homologous normal Species
NAME OF THE SPECIES	PROTEIN NAME	YEAR	UNIPORTid	LENGTH	NORMAL UNIPORTid	ORGANISM NAME	LENGTH
AMPHLIRHAGADA ASTUTA	Cytochrome c oxidase subunit 1	1939	A0A0A7KR38	218	A0A0F6MU97	Cepaea hortensis	218
CRISTILABRUM BUBULUM	Cytochrome c oxidase subunit 1	1981	S4VK56	218	A0A059NTT9	Cepaea nemoralis	218
Helix texta	Cytochrome c oxidase subunit 1	1861	T1QBM6	219	H7B8U8	Lophocampa sp. modestaBE01	219
Helix texta	Cytochrome c oxidase subunit 1	1861	I6LUX0	219	D2XFM5	Lophocampa sp. maroniensisDHJ03	219
Leptaxis caldeirarum"		1857	Q5XMJ7
Leptaxis caldeirarum"	Cytochrome c oxidase subunit 1	1857	A0A1W6BQP3	218
"Pyrenaearia organiaca"	Cytochrome c oxidase subunit 1	1905	G8XPU6	148	G8XPU3	Pyrenaearia parva	148
"Trochulus biconicus"	Cytochrome c oxidase subunit 1	1917	A0A068FUR4	218	B6RAU6	Satsuma auratibasis	218
"Xerocrassa montserratensis"	Cytochrome c oxidase subunit 1	1870	A0A1I9KHD3	223	A0A1I9KHZ3	Xerocrassa roblesi	223
"Xerocrassa moraguesi"	Cytochrome c oxidase subunit 1	1883	A0A1I9KHB8	223	A0A1I9KH65	Xerocrassa frater frater	223
Xerosecta adolfi"	Cytochrome c oxidase subunit 1	1854	A0A1I9KHN7	223	A0A1I9KHE9	Xerocrassa derogata	223
"megalobulimus parafragilior"	Cytochrome c oxidase subunit 1	1990	G9CKG2	217	A0A0K0V6I9	Arion vulgaris	218
"Victaphanta compacta"	Cytochrome c oxidase subunit 1	1912	Q2PWT5	310	B8XFP2	Natalina quekettiana	318
"Bythinella bavarica"	Cytochrome c oxidase subunit 1	1877	B5TWU4	212	B5TX38	Bythinella rufescens	212
"Bythinella carinulata"	Cytochrome c oxidase subunit 1	1868	B5TX58	212	B5TWK9	Bythinella austriaca	212
"bythinella viridis"	Cytochrome c oxidase subunit 1	1801	B5TX60	212	C3UJX4	Bythinella molcsany	212
"Jardinella acuminata"	Cytochrome c oxidase subunit 1	1990	Q5GDF5	178	A0A223PIT4	Provanna ios	176
"Jardinella jesswiseae"	Cytochrome c oxidase subunit 1	1990	Q5GDG9	108	A0A088FGT3	Eulepetopsis vitrea	111
Jardinella pallida"	Cytochrome c oxidase subunit 1	1990	Q5GDH0	134	W8CKD3	Buccinum undatum	134
Marstonia agarhecta"	Cytochrome c oxidase subunit 1	1969	Q8M0U3	202	Q8M0W0	Floridobia winkleyi	202
Marstonia agarhecta"	NADH-ubiquinone oxidoreductase chain 1	1969	Q68T73	176	W6HXV7	Pyrgulopsis umbilicata	176
"Pyrgulopsis bernardina"	Cytochrome c oxidase subunit 1	1987	Q5IWI0	207	A0A059SWW0	Pseudamnicola meloussensis	209
Pyrgulopsis bernardina	NADH-ubiquinone oxidoreductase chain 1	1987	Q5IWC7	176	W6HXV7	Pyrgulopsis umbilicata	176
"Pyrgulopsis cruciglans"	Cytochrome c oxidase subunit 1	1998	Q5IWK0	214	I6U2E7	Micrura sp. 'dark'	219
Pyrgulopsis cruciglans	NADH-ubiquinone oxidoreductase chain 1	1998	Q5IWE8	176	Q68TB4	Pyrgulopsis kolobensis	176
Pyrgulopsis metcalfi"	Cytochrome c oxidase subunit 1	1987	D0EX05	219	C3UJX4	Pyrgulopsis sancarlosensis	219
Pyrgulopsis metcalfi"	NADH-ubiquinone oxidoreductase chain 1	1987	D0EX19	167	W6HYF8	Pyrgulopsis roswellensis	166
Assiminea pecos	Cytochrome c oxidase subunit 1	1987	Q19AD3	219	G9B399	Mitrella bicincta	219
"Cremnoconchus syhadrensis"	Cytochrome c oxidase subunit 1	1863	Q7Y9B0	207	Q50H86	Pachychilus indiorum	207
"Io fluvialis"	Cytochrome c oxidase subunit 1	1825	Q85TY5	296	Q85TY3	Pleurocera canaliculata	296
Io fluvialis	Cytochrome c oxidase subunit 1	1825	B2X1H0	219	Q45G45	Pleurocera sp. RM-2005	219
Io fluvialis	tRNA-(Ms[2]io[6]A)-hydroxylase	1825	S7IBM4	259	A0A0X8LMS5	Vibrio fluvialis	259
Leptoxis taeniata"	Cytochrome c oxidase subunit 1	1834	A0A096YDS8	219	A0A1W5LKI2	Pollia scacchiana	219
Supplimentary S1( Table 3 ):-protein sequence data of Endangered Species Invertibrate and their homologous normal Species
NAME OF THE SPECIES	PROTEIN NAME	YEAR	UNIPORT ID	LENGTH	NORMAL UNIPORT ID	ORGANISM NAME	LENGTH
Samoana diaphana		1953	C4MXE1	213
Montipora dilatata	Cytochrome c oxidase subunit 1	1901	F2WTW3	213	F2WTW6	Montipora verrilli	213
Montipora dilatata	Cytochrome b	1901	F2WTV8	193	D3G8H9	Montipora digitata	204
Montipora dilatata	ATP synthase subunit a	1901	F2WTZ5	159	F2WTZ2	Montipora flabellata	159
Pocillopora fungiformis	ATP synthase subunit a	2000	A0A1W6RZ56	44	V5NRZ5	Pocillopora eydouxi	48
Pocillopora fungiformis	NADH dehydrogenase subunit	2000	A0A1W6RZD5	26	A0A1W6RZD7	Pocillopora acuta	26
Pocillopora fungiformis	ATP synthase subunit 8	2000	A0A1W6RZD1	70	B2L1F6	Pocillopora ligulata	70
Poecilotheria formosa	NADH-ubiquinone oxidoreductase chain 1	1899	A0A220XI11	137	A0A290DW43	Poecilotheria regalis	137
Poecilotheria rufilata	NADH-ubiquinone oxidoreductase chain 1	1899	A0A220XHL2	137	A0A220XI11	Poecilotheria formosa	137
Branchinecta sandiegonensis	Cytochrome c oxidase subunit 1	1993	B7U6Q7	216	S5W114	Phallocryptus spinosa	219
Supplimentary S1( Table 4 ):-protein sequence data of Endangered Species Amphebian and their homologous normal Species
SPECIES	PROTEIN NAME	YEAR	UNIPORTid	LENGTH	NORMALUNIPORT ID	ORGANISM NAME	LENGTH
Batrachoseps campi	Cytochrome c oxidase subunit 1	1979	A9Y824	515	P00398	Xenopus laevis	518
Batrachoseps campi	NADH-ubiquinone oxidoreductase chain 2	1979	A9Y823	346	Q644U4	Batrachoseps wrighti	346
Batrachoseps campi	Recombination activating protein 1	1979	A0A096Y4F4	502	Q50F89	Ensatina eschscholtzii	508
Batrachoseps campi	Pro-opiomelanocortin	1979	A0A096Y3X1	158	F6LWE4	Batrachoseps wrighti	160
Bolitoglossa conanti	Recombination activating protein 1	1993	M4WFB7	268	A0A0K0VPX0	Nototriton brodiei	268
Bolitoglossa conanti	Cytochrome b	1993	D6NU59	260	A0A0M3SAH0	Pseudoeurycea aurantia	268
Bolitoglossa dunni	Cytochrome b	1933	D6NU60	260	A0A0M4JIF5	Pseudoeurycea tenchalli	237
Bolitoglossa dunni	Recombination activating protein 1	1933	M4WNH8	268	M4X885	Thorius troglodytes	268
Bolitoglossa heiroreias	Cytochrome b	2004	F8RP65	188	F8RP71	Bolitoglossa franklini	176
B.meliana	Cytochrome b	1982	F8RP59	199	F8RP59	Bolitoglossa meliana	199
Bolitoglossa minutula	Recombination activating protein 1	1973	M4WPE0	268	S5TS15	Thorius boreas	272
Bolitoglossa minutula	Cytochrome b	1973	Q9MLT6	191	Q307T7	Schoeniclus spodocephala	188
Bolitoglossa porrasorum	Cytochorome b	1995	Q6QTB6	215	Q9G0L4	Bolitoglossa yucatana	215
Bolitoglossa tica	Cytochrome b	2008	I3QPS9	252	I3QPS1	Bolitoglossa gomezi	250
Cryptotriton alvarezdeltoroi	Brain-derived neurotrophic factor	1987	A0A0K0VPM5	230	A9QWH8	Desmognathus brimleyorum	230
Cryptotriton alvarezdeltoroi	Recombination activating protein 1	1987	A0A0K0VPW5	267	S5TTM7	Thorius macdougalli	272
Cryptotriton alvarezdeltoroi	Solute carrier family 8 member 3	1987	A0A0K0VPY0	267	A0A0K0VPX5	Cryptotriton monzoni	262
Cryptotriton alvarezdeltoroi	Cytochrome b	1987	A0A0K0VPP4	256	A0A0K0VPP4	Cryptotriton alvarezdeltoroi	256
Dendrotriton chujorum	Cytochrome b	2010	I6NQD4	265	I6NKW1	Dendrotriton chujorum	265
Dendrotriton chujorum	Recombination activating protein 1	2010	I6NR27	250	I6NR31	Dendrotriton sanctibarbarus	250
Dendrotriton chujorum	Solute carrier family 8 member 3	2010	I6NQG0	243	A0A0K0VPX3	Cryptotriton monzoni	253
Dendrotriton chujorum	Pro-opiomelanocortin	2010	I6NPL9	160	I6NPM5	Dendrotriton sanctibarbarus	160
D.sanctibarbarus	NADH-ubiquinone oxidoreductase chain 1	1997	A0A0P0DPV9	192	P51931	Drosophila guanche	163
Dendrotriton sanctibarbarus	Cytochrome c oxidase subunit 1	1997	A0A0P0CVN3	229	A0A059RUZ1	Homo sapiens	228
Dendrotriton sanctibarbarus	Cytochrome c oxidase subunit 1	1997	A0A0P0DQ37	405	A0A0N7I0E6	Pseudoeurycea rex	405
Dendrotriton sanctibarbarus	Solute carrier family 8 member 3	1997	I6NKX3	243	A0A0K0VPY2	Cryptotriton sierraminensis
Supplimentary S1( Table 5 ):-protein sequence data of Endangered Species Arthopoda and their homologous normal Species
SPECIES	NAME OF THE PROEIN	YEAR	UNIPORTid	PDBid	LENGTH	NORMAL UNIPORT ID	ORGANISM NAME	LENGTH
Patri.david	Serine/threonine-protein kinase receptor R3	1979	P37023	2LCR	503	A0A0S2Z310	HUMAN	503
Patri.david		1979	P37023	3MY0
Patri.david		1979	P37023	4FAO
Poecilotheria rufilata	NADH-ubiquinone oxidoreductase chain 1	1899	A0A220XHL2	N/F	137	A0A220XHK6	Poecilotheria hanumavilasumica	137
Branchinecta sandiegonensis	Cytochrome c oxidase subunit 1	1993	B7U6Q7	N/F	216	S5W114	Phallocryptus spinosa	219
Lepidurus packardi	Cytochrome c oxidase subunit 1	1886	M1K1P3	N/F	219	K7QH76	Lepidurus packardi	219
Streptocephalus guzmani	Cytochrome c oxidase subunit 1	1995	Q6E7T8	N/F	199	V9PRJ9	Artemia parthenogenetica	204
Speocirolana thermydronis	Cytochrome c oxidase subunit 1	1966	Q6GZC7	N/F	219	Q6GZC8	Speocirolana thermydronis	219
Gammarus troglophilus	Cytochrome c oxidase subunit 1	1994	B2CRG7	N/F	216	B2CRG6	Gammarus troglophilus	216
Euastacus clarkae	Cytochrome c oxidase subunit 1	1997	Q3YNZ8	N/F	223	Q3YP22	Euastacus armatus	223
Ceylonthelphusa alpina	Cytochrome c oxidase subunit 1	2005	D2WJV0	N/F	217	B5SYF8	Orconectes packardi	219
Ceylonthelphusa callista	Cytochrome c oxidase subunit 1	1995	D2WJY1	N/F	218	A7J4Y1	Munida quadrispina	219
Migmathelphusa olivacea	Cytochrome c oxidase subunit 1	2006	K0JNH8	N/F	191	U5LMZ6	Parathelphusa linduensis	191
Migmathelphusa olivacea	Histone H3	2006	K0JLZ3	N/F	105	P62807	Homo sapiens	126
Oziotelphusa ceylonensis	Cytochrome c oxidase subunit 1	1960	D2WJV8	N/F	216	B5SYF6	Orconectes packardi	219
Oziotelphusa ceylonensis	Histone H3	1960	B8ZI75	N/F	105	R9QQ72	Proceps acicularis	105
Spiralothelphusa fernandoi	Cytochrome c oxidase subunit 1	1994	D2WJZ3	N/F	217	D2WJY4	Spiralothelphusa wuellerstorfi	217
Supplimentary S1( Table 6 ):-protein sequence data of Endangered Species Fungi and their homologous normal Species
SPECIES	PROTEIN NAME	YEAR	UNIPORTid	LENGTH	NORMAL UNIPORTID	ORGANISM	LENGTH
SARCOSOMA GLOBOSUM	DNA-directed RNA polymerase subunit beta	1891	M9YSF7	534	A1X1C7	Galiella rufa	531
CLADOMIA PERFORATA	Tubulin beta chain	1952	Q8J2B6	227	Q8J2D1	Cladonia amaurocraea	234
ERIODERMA PEDICELLATUM	RNA polymerase 2 largest subunit	1972	A0A023IMZ7	185	D3IVY3	Pseudocyphellaria aurata	195
ERIODERMA PEDICELLATUM		1972	A0A140HRT8	134
ARMILLARIA E CTYPA	Translation elongation factor EF1-alpha	1965	D2SRJ2	220	T1R180	Fomitiporia sp.	236
Lobaria pulmonaria	DNA-directed RNA polymerase subunit beta	1796	N0BPM2	191	A0A0A0QF22	Usnea chaetophora	195
Lobaria pulmonaria		1796	E3SRD2	264	A0A0B4KZ03	Lobaria isidiophora	255
Lobaria pulmonaria		1796	A4ZHZ4	227

## Sheet: AAs composition
Supplimentary S1( Table 7 ):-amino acid compoition data of normal homologues of Endangered fungi
Ala	Cys	Asp	Glu	Phe	Gly	His	Ile	Lys	Leu	Met	Asn	Pro	Gln	Arg	Ser	Thr	Val	Trp	Tyr
4.70588	0.429185	4.72103	4.61538	1.53846	5.4902	1.28755	2.13675	2.5641	4.72103	2.57511	2.5641	5.12821	2.57511	3.00429	3.92157	4.61538	5.64103	0	1.28755
4.89642	1.12994	5.98291	4.70085	2.7451	7.15631	2.5641	5.64103	4.70588	5.12821	2.7451	4.14313	5.27307	2.7451	4.61538	4.10256	4.70588	5.64103	0.376648	1.53846
5.12821	1.76506	6.02556	7.29614	3.00429	7.85149	2.5641	5.9647	4.89642	6.40301	3.07692	4.2735	5.5794	2.99145	5.55556	4.10256	5.84297	8.09793	0.42735	1.56863
5.84297	2.13675	6.02637	7.36458	3.20151	8.20513	2.79976	6.40301	5.59951	7.12112	3.34753	4.44309	5.98291	3.07692	5.72124	4.72103	5.98291	8.58186	0.8521	2.13675
6.66667	2.35294	6.15385	8.28625	3.46926	8.20513	2.82486	6.86695	6.66667	8.62745	3.4188	4.70588	6.02556	3.95618	6.27451	4.99087	6.02637	10.1961	1.53846	2.43457
7.29614	2.5641	6.27451	8.71795	4.61538	8.97436	3.52941	7.05882	7.17949	9.23077	3.58974	5.12821	7.05882	5.27307	6.66667	5.46139	6.43777	10.2564	1.56863	3.38983
7.69231	3.07692	7.17949	9.01961	5.98291	10.3004	4.10256	7.17949	9.01288	9.40171	3.9548	6.00858	8.20513	5.64103	6.77966	6.83761	7.17949	11.1588	1.71674	3.58974
Supplimentary S1( Table 8 ):-amino acid compoition data of Endangered Species Fungi
Ala	Cys	Asp	Glu	Phe	Gly	His	Ile	Lys	Leu	Met	Asn	Pro	Gln	Arg	Ser	Thr	Val	Trp	Tyr
4.38931	0	5.2356	4.84581	2.16216	1.50376	1.84332	2.20264	2.64317	5.52995	2.30415	2.6178	4.51128	2.30415	3.68664	3.78788	2.7027	4.51128	0	1.32159
4.54545	0	5.26316	5.2356	2.25564	5.68182	2.16216	4.51128	4.38931	6.1674	2.6178	3.7594	5.52995	2.7027	4.51128	3.96476	4.40529	4.86486	0.381679	1.38249
4.86486	1.14504	5.52995	6.91244	2.65152	7.25191	2.25564	5.06912	4.51128	6.29771	2.65152	4.00763	5.53435	3.0303	5.2356	4.18848	4.54545	6.28272	0.440529	1.51515
5.75916	1.72764	5.72519	7.56757	3.0837	7.31707	2.64317	5.72687	4.54545	7.02703	3.25203	4.21748	5.72687	3.0837	5.28634	4.86486	5.58943	7.04846	0.75188	1.62162
5.79268	2.20264	6.04675	7.67276	3.22581	7.48899	2.67176	5.99593	5.74187	7.67276	3.52423	4.40529	5.75916	3.52423	5.72687	5.18293	5.72687	8.13008	0.914634	2.20264
6.91244	2.27273	6.06061	8.37004	3.24427	7.56757	2.7439	6.80628	6.80628	8.37696	3.52423	4.40529	6.14837	4.16667	5.79268	5.52995	6.29771	8.20611	1.32159	2.48984
7.04846	2.64317	6.1674	8.58779	3.40447	7.8534	3.0837	6.87023	7.48899	8.71212	3.62595	4.54545	7.04846	4.96183	6.06061	5.72519	6.76692	9.69163	1.51515	3.62595
7.48899	2.7027	6.60793	9.09091	4.71204	9.2511	3.40909	7.02703	8.75576	9.69163	3.7594	4.86486	7.19697	5.2356	6.48649	6.01504	6.80628	10.2273	1.62162	3.66492
8.27068	3.14136	8.10811	9.77444	5.72687	10.1382	3.66492	7.95455	9.18919	13.5338	3.78378	5.06912	8.10811	9.77444	7.06107	7.04846	6.91244	11.5207	1.84332	3.7594
Supplimentary S1( Table 9 ):-amino acid compoition data of Endangered Species invertibrate
Ala	Cys	Asp	Glu	Phe	Gly	His	Ile	Lys	Leu	Met	Asn	Pro	Gln	Arg	Ser	Thr	Val	Trp	Tyr
0	0	0	0	6.48148	2.27273	0	7.14286	0	10.219	0	0	0	0	0	0	0	4.37956	0	1.38889
3.62694	0	0	0.938967	7.98122	4.37956	0	7.54717	0	10.219	1.25786	2.51572	0	0.938967	0	2.85714	2.85714	5.10949	0	1.40845
5.10949	0	1.25786	1.38889	7.98122	4.37956	0	7.87037	0	12.8571	1.42857	2.91971	4.28571	1.25786	1.87793	5.6338	2.91971	5.6338	1.25786	1.87793
5.6338	0	1.45985	1.40845	9.94318	5.69948	0	7.98122	0.469484	13.615	2.07254	3.10881	4.37956	1.38889	2.18978	6.91824	2.91971	6.01852	1.45985	1.88679
5.66038	0	1.45985	1.45985	10.219	7.69231	1.63352	8.4507	1.5544	14.4886	2.91971	3.48011	4.37956	1.5544	2.18978	7.25389	3.14465	7.14286	1.45985	2.76989
6.39205	0	2.07254	1.45985	10.219	8.30966	1.85185	8.80829	1.98864	14.5078	3.64964	3.7037	4.40252	1.5625	2.31481	8.33333	3.62694	7.51174	1.87793	3.64964
6.56934	0.355114	2.27273	1.77557	11.9497	8.57143	1.87793	9.87216	2.27273	15.493	4.33239	3.75587	5.16432	2.18978	2.34742	8.7358	4.40341	7.69231	2.27273	3.64964
7.69231	0.729927	2.27273	2.27273	12.4352	9.43396	1.87793	11.5385	2.51572	16.2037	4.54545	3.84615	5.25568	2.18978	2.41477	9.38967	5.09259	7.74148	2.31481	3.84615
8.7963	0.729927	3.24074	2.51572	13.6364	10.6481	2.27273	13.6364	5.10949	17.6101	6.01852	4.22535	6.21762	2.27273	3.10881	11.5385	6.10329	10.8808	2.34742	4.28571
9.09091	0.938967	3.28638	2.59067	14.2857	10.7981	2.51572	15.3285	5.71429	18.1818	6.10329	4.28571	6.57277	3.84615	3.14465	14.5985	6.10329	13.2075	2.59067	4.54545
9.85915	2.27273	3.28638	4.28571	19.2308	11.2676	3.10881	16.7883	5.83942	23.0769	7.98122	4.37956	6.94444	5.71429	4.28571	16.7883	6.81818	13.6364	10	5.18135
Supplimentary S1( Table 10 ):-amino acid compoition data of normal homologues of Endangered invertibrate
Ala	Cys	Asp	Glu	Phe	Gly	His	Ile	Lys	Leu	Met	Asn	Pro	Gln	Arg	Ser	Thr	Val	Trp	Tyr
0	0	0	0	6.39269	4.16667	0	7.14286	0	10.219	0	0	0	0.938967	0	0	0	3.73134	0	1.82648
3.92157	0	0	0.938967	7.98122	4.37956	0	7.35294	0	11.9403	1.25786	2.51572	0	1.25786	0	2.85714	2.23881	4.37956	0	1.87793
5.10949	0	1.25786	1.36986	8.95522	5.22388	0	7.54717	0.469484	12.7451	1.42857	2.91971	3.73134	1.36986	1.49254	5.6338	2.85714	5.6338	1.25786	1.88679
5.66038	0	1.45985	1.45985	9.91736	7.35294	0	7.98122	1.47059	12.8571	2.45098	2.98507	4.28571	1.90083	1.87793	6.91824	2.91971	5.93607	1.45985	2.97521
5.97015	0	1.49254	1.47059	10.219	7.69231	1.57025	8.21918	2.08333	14.5455	2.91971	3.30579	4.37956	1.96078	2.18978	7.84314	3.14465	7.14286	1.49254	3.64964
6.52893	0	2.08333	1.49254	10.7843	8.09917	1.82648	10.1653	2.39669	15.493	2.98507	3.43137	4.40252	2.08333	2.28311	8.6758	4.29752	7.69231	1.87793	3.73134
7.69231	0.247934	2.14876	1.65289	11.9497	8.57143	1.87793	11.5385	2.51572	15.9817	3.63636	3.65297	5.20661	2.18978	2.31405	8.84298	4.41176	7.7686	2.28311	3.84615
8.6758	0.729927	2.45098	2.08333	14.2857	9.43396	2.08333	12.5	5.71429	17.6101	4.16667	3.84615	6.37255	2.23881	2.94118	11.5385	5.93607	11.7647	2.47934	4.16667
9.85915	0.746269	3.19635	2.51572	14.5833	9.58904	2.51572	16.7883	5.83942	18.75	5.93607	4.22535	6.57277	3.84615	3.14465	15.6716	6.10329	12.5	3.92157	4.28571
10.4167	2.08333	3.28638	4.28571	19.2308	11.2676	2.94118	17.9104	5.97015	23.0769	6.10329	4.28571	6.84932	5.71429	4.28571	16.7883	6.25	13.2075	10	4.41176
Supplimentary S1( Table 11 ):-amino acid compoition data of Endangered Species arthopoda
Ala	Cys	Asp	Glu	Phe	Gly	His	Ile	Lys	Leu	Met	Asn	Pro	Gln	Arg	Ser	Thr	Val	Trp	Tyr
5.76541	0	1.45985	0.896861	2.38569	4.37956	0	3.80952	0	10.219	0.952381	0.952381	4.37956	1.34529	1.84332	5.71429	2.91971	4.7619	0	1.38889
6.48148	0	2.51256	0.913242	3.80952	5.71429	1.38249	3.84615	0	10.4762	0.961538	0.961538	4.7619	1.36986	1.84332	5.76923	5.09259	4.80769	0	1.50754
6.56934	0	2.6178	0.921659	3.84615	5.76923	1.38889	3.97614	0	10.5769	1.98807	3.18091	4.80769	1.38249	1.85185	6.27803	5.09259	5.10949	1.45985	1.57068
7.94393	0	2.85714	0.921659	5.52764	7.75348	1.40187	6.84932	0	12.1272	3.64964	3.58744	5.38117	1.38889	1.85185	6.45161	5.36779	5.47945	1.86916	1.79372
8.07175	0	2.88462	0.925926	5.72591	8.37696	1.50754	7.62332	0	13.8249	4.56621	3.65297	5.52995	1.38889	1.86916	6.48148	5.93607	6.01852	1.98807	1.82648
8.29493	0	3.19635	0.934579	5.93607	9.04523	1.57068	7.69712	0	13.9013	5.55556	3.7037	5.5666	1.38889	2.09424	6.54206	6.00751	6.03015	2.09424	1.84332
8.3229	0	3.22581	1.04712	5.99078	9.13242	1.79372	7.87037	0	13.9549	5.78849	3.78598	5.75916	1.40187	2.18978	6.75944	6.03015	6.45161	2.09637	1.85185
8.33333	0	3.22581	1.36986	6.01852	9.16771	1.82648	8.0402	0	14.0187	6.01852	4.0201	5.85106	1.50754	2.24215	6.91244	6.39269	6.72716	2.28311	2.09637
8.6758	0	3.24074	1.38889	6.01852	9.25926	1.82648	8.29493	0	14.1361	6.53266	4.10959	5.93607	1.57068	2.28311	7.30594	6.45161	6.84932	2.28311	2.18688
8.7963	0.460829	3.24074	1.38889	6.28272	9.67742	1.84332	8.37696	0	14.2857	7.17489	4.14747	5.99078	1.82648	2.28311	7.30594	6.45161	6.91244	2.30415	2.28311
8.90052	0.729927	3.27103	1.45985	6.45161	10.5991	1.85185	8.7963	0.44843	14.3519	7.30594	4.14747	6.01852	1.84332	2.31481	7.32984	6.48148	7.00935	2.30415	2.30415
9.13242	0.750939	3.37922	1.50754	6.48148	10.6481	1.85185	8.8785	1.37672	14.6119	7.40741	4.16667	6.07477	2.18978	2.51256	7.4781	6.54206	7.17489	2.31481	2.31481
9.54774	0.913242	3.58744	2.15895	6.54206	10.6481	1.90476	9.13242	3.77734	14.8148	8.29493	4.20561	6.39269	2.28411	3.41051	8.33333	6.66667	7.32984	2.31481	2.33645
9.67742	0.952381	3.65297	5.71429	6.84932	10.7477	1.92308	9.21659	5.10949	16.2037	8.29493	4.37956	6.48148	4.57256	6.95825	8.54271	6.73077	7.40741	2.51256	2.85714
13.3333	0.961538	3.7037	5.76541	7.62332	10.7623	1.93992	9.25926	7.69231	16.5829	8.41121	4.71204	6.53266	5.71429	10.4762	9.72222	6.80628	7.75348	2.69058	2.88462
13.4615	3.57853	4.77137	5.76923	10.219	11.4155	3.77734	15.3285	8.57143	16.895	9.42408	5.09259	6.94444	5.76923	10.5769	14.5985	7.62332	7.87037	2.77778	3.64964
Supplimentary S1( Table 12 ):-amino acid compoition data of normal homologues of Endangered arthopoda
Ala	Cys	Asp	Glu	Phe	Gly	His	Ile	Lys	Leu	Met	Asn	Pro	Gln	Arg	Ser	Thr	Val	Trp	Tyr
5.76541	0	1.45985	0.896861	1.5873	5.10949	0	2.88462	0	4.7619	0.961538	0.961538	3.64964	0.913242	1.84332	5.76923	2.91971	3.64964	0	1
5.83942	0	2.38095	0.913242	2.38569	5.55556	0.961538	3.97614	0	9.61538	1.98807	2.38095	4.7619	1	1.87793	6.27803	4.90196	4.80769	0	1.40845
6.57277	0	2.6178	0.913242	3.84615	5.76923	1.38249	4.7619	0	10.219	2.38095	2.91971	4.80769	1.34529	2.09424	6.45161	5.16432	5.93607	1.45985	1.47059
6.84932	0	2.88462	0.913242	5.2356	7.75348	1.5	6.39269	0	12.1272	3.64964	3.18091	5.02283	1.36986	2.18978	6.75944	5.36779	6	1.96078	1.57068
6.84932	0	3	0.921659	5.39216	8.82353	1.57068	6.39269	0	13.5387	5	3.58744	5.02283	1.36986	2.24215	6.80628	5.93607	6.84932	1.98807	1.79372
7.76256	0	3.19635	1	5.6338	9.13242	1.79372	6.39269	0	13.6126	5.6338	3.61033	5.38117	1.36986	2.28311	6.84932	6.13134	6.86275	2.1164	1.82648
7.96763	0	3.19635	1.04712	5.69561	9.18145	1.82648	7.46965	0	13.8249	5.82011	3.65297	5.5	1.38249	2.28311	6.84932	6.28272	6.91244	2.28311	1.82648
8.07175	0	3.22581	1.36986	6	9.38967	1.82648	7.62332	0	13.9013	5.88235	3.65297	5.5666	1.40845	2.28311	7.30594	6.34921	7.14286	2.28311	1.82648
8.29493	0	3.43137	1.36986	6.39269	9.42408	1.82648	8.21918	0	14.1553	5.93607	3.65297	5.75786	1.57068	2.28311	7.30594	6.39269	7.17489	2.28311	1.82648
8.6758	0	3.45472	1.40845	6.45161	9.58904	1.82648	8.21918	0	14.1553	7.17489	3.65297	5.75916	1.82648	2.28311	7.5	6.39269	7.18954	2.28311	2.02303
8.6758	0	3.58744	1.45985	6.84932	10.5023	1.87793	8.33333	0.44843	14.554	7.76256	3.66492	5.99078	1.96078	2.45098	7.81201	6.45161	7.30594	2.28311	2.18688
9.31373	0	3.65297	1.47059	6.84932	10.5023	1.96078	8.37696	1.80517	14.6119	7.76256	3.92157	6.39269	2.14753	2.5	8.6758	6.5	7.75348	2.30415	2.28311
9.94764	0.653595	3.65297	2.17865	7.30594	10.5991	2.02303	8.92019	3.77734	14.6119	7.76256	4	6.39269	2.18978	3.42359	8.82353	7.30594	7.8534	2.5	2.30415
10	0.729927	3.65297	5.55556	7.30594	10.7623	2.28311	9.21659	5.83942	15.6863	7.76256	4.10959	6.57277	2.38095	6.34921	9.85915	7.30594	7.98122	2.6178	2.88462
10.3175	0.913242	3.75587	5.76541	7.62332	10.9589	2.38095	9.5	9.61538	15.9817	8.29493	4.14747	6.84932	4.57256	6.95825	11.1111	7.62332	9.13242	2.69058	3.64964
12.5	3.57853	4.77137	5.76923	9.48905	11	3.77734	18.2482	15.873	16.5	9.94764	5.16432	7.35294	6.73077	11.5385	15.3285	7.69231	9.13242	2.8169	3.96825
Supplimentary S1( Table 13 ):-amino acid compoition data of Endangered Species amphebian
Ala	Cys	Asp	Glu	Phe	Gly	His	Ile	Lys	Leu	Met	Asn	Pro	Gln	Arg	Ser	Thr	Val	Trp	Tyr
1.26582	0	0.520833	0.934579	2.6087	3.49345	0	1.89873	0.543478	3.75	2.33645	2.17391	2.65957	0.769231	1.15607	4.52675	2.53165	2.89017	0.401606	2.31214
3.75	0	0.578035	1.00503	3.17919	3.75723	0.869565	2.5	1.06383	5.06329	2.40964	2.46914	2.67176	1.00503	1.23457	4.54545	3.29218	3.16456	0.996016	2.40964
4.81928	0	2.51256	1.06383	3.74532	4.11985	1.875	3.91304	1.31004	8.26087	2.62172	2.47934	2.88066	1.06383	1.50943	5.34351	3.30579	3.46154	1.25	2.60417
5.46875	0.194175	2.65957	1.15385	3.79747	4.86891	1.89873	4.90566	1.50754	8.39695	2.64151	2.67176	2.89256	1.15385	1.53846	6.34921	3.43511	4.23077	1.26582	2.98805
5.67686	0.289017	2.71605	1.17188	4.01606	4.90566	2.02312	4.90566	1.53846	8.67925	2.99625	3.1068	2.99625	1.17188	1.53846	6.53846	3.74532	4.29688	1.30435	3.37079
5.76923	0.520833	2.71739	1.19048	4.15094	4.90566	2.58964	4.98008	1.5534	8.98876	3.01887	3.20988	2.99625	1.19048	1.5625	6.54206	3.75	4.36681	1.49813	3.37079
5.76923	0.873362	2.73438	1.50943	4.36681	5.17928	2.81124	5.22088	1.5873	9.09091	3.125	3.21285	3.01508	1.20482	1.5873	6.77083	3.77358	4.375	1.49813	3.39623
5.9761	1.13208	2.77778	1.53846	4.375	5.34979	3.05344	5.24345	1.86916	9.3633	3.1746	3.49345	3.01887	1.23457	1.74757	6.91489	4.11985	4.49438	1.50943	3.49345
6.08696	1.15385	2.80374	1.63043	4.49438	5.3719	3.05677	5.24345	1.88679	9.43396	3.18725	3.7234	3.01887	1.40187	1.86916	6.92308	4.15094	4.49438	1.50943	3.57143
6.36704	1.15385	3.01887	1.7341	4.5283	5.72519	3.24364	5.72519	1.92308	9.46502	3.26087	3.78486	3.26087	1.50943	2.01005	6.99029	4.58167	4.5283	1.52672	3.70909
6.41509	1.17188	3.07692	1.94175	4.78088	6.25	3.26087	6.58436	1.95312	9.56175	3.51562	4.04624	4.01606	1.5534	2.08333	7.03518	5.15873	4.5283	1.64609	3.7234
6.41509	1.19048	3.07692	2.08333	5.34351	6.4257	3.30097	6.61157	2.22222	9.62963	3.51759	4.16667	4.18327	1.87266	2.12766	7.16049	5.28302	4.6875	1.65289	3.75
6.54206	1.40187	3.1068	2.22222	5.72917	6.74909	3.37079	6.92364	3.17919	9.63855	3.7234	4.34783	4.20561	1.88679	2.17391	7.16981	5.65217	4.90566	2.18341	3.77358
6.63273	1.50754	3.37079	5.26545	5.76132	6.95652	3.39623	7.14286	3.64583	10.3261	3.77358	4.50909	4.52364	2.09455	2.62009	7.42188	5.87636	5.31915	2.28364	3.77358
6.74157	1.52727	3.37079	5.67686	5.78512	7.53968	3.39623	7.29167	4.40727	10.4803	3.84615	4.5283	5	2.17391	3.98545	7.49064	6.0241	5.51273	2.60417	3.79747
7.02479	1.59574	3.39623	6.48855	6.22545	7.54717	3.51562	7.37864	6.0241	11.2291	3.91304	4.86891	5.04854	2.19124	4.81928	7.49091	6.15385	5.52764	2.69231	3.80435
7.16981	1.63043	3.39623	6.58436	7.40741	7.69231	3.71901	7.65432	6.74157	12.0388	4.11523	4.86891	5.15873	2.24719	4.96183	7.56972	6.15385	5.55556	2.73438	3.8835
7.40741	1.9084	3.54909	6.61157	7.57282	7.69231	3.74532	8.46154	6.95652	12.0603	4.19847	4.90566	5.21739	2.26415	5.34979	7.92453	6.54206	5.9761	2.77778	3.91304
7.40741	2.05761	3.75	6.95652	8.20312	7.8125	3.77358	8.69565	7.1161	12.6168	4.23077	5.52764	5.49133	2.31214	5.3719	8.2397	6.64062	5.97826	3.07692	4.0201
7.44681	2.06612	3.93013	9.96016	8.46154	8.41121	3.84615	8.73362	7.16981	12.8302	4.26182	5.66038	5.67686	2.53165	6.3745	8.30189	6.77083	6.08696	3.17919	4.11523
7.53769	2.39044	4.43038	10.4418	8.73016	8.75	4.0201	8.98438	7.37052	13.2979	4.43038	6.07477	5.67901	2.60417	6.875	8.3815	6.99029	6.54206	3.20988	4.13223
7.53968	2.62172	5.34979	10.625	8.84615	8.93204	4.11523	9.04255	7.54717	13.6719	4.54545	6.15385	5.76923	3.125	6.95652	8.43373	7.03518	6.99588	3.26087	4.20561
7.8125	2.64151	5.3719	10.7595	8.8785	9.04255	4.20561	9.0566	8.125	14.6154	5.18519	6.53846	6.03774	3.7037	7.49064	8.69565	7.06522	7.18447	3.27103	4.23077
7.96117	2.64151	5.37849	10.8614	9.04523	9.04523	4.23077	9.34579	8.22785	14.6154	6.21359	6.96203	6.15385	3.71901	7.54717	8.73362	7.44681	7.40741	3.30097	4.44444
8.01527	3.04348	5.65217	11.236	9.43396	9.1358	4.25532	9.54774	8.23045	15.873	6.25	7.03125	6.25	3.91304	7.92453	9.56522	8.39506	7.43802	3.39623	4.58015
8.09249	3.21285	5.72519	11.3208	9.78261	9.23913	4.36508	9.61538	8.26446	17.052	7.86026	7.53968	6.32911	3.93013	8.86076	12.5	10.0437	7.63359	3.51759	4.61538
8.15217	3.74532	6.4257	11.3208	10.1064	10.1266	4.44444	9.82659	8.39695	20.3125	9.24855	8.75	7.29167	4.19847	9.3633	12.6582	11.2717	8.03213	3.7234	4.6875
Supplimentary S1( Table 14 ):-amino acid compoition data of normal homologues of Endangered amphebian
Ala	Cys	Asp	Glu	Phe	Gly	His	Ile	Lys	Leu	Met	Asn	Pro	Gln	Arg	Ser	Thr	Val	Trp	Tyr
1.25	0	0.613497	0.568182	2.17391	3.46821	0	1.875	1.11111	3.75	2.4	2.37154	2.38095	1.00503	1.15607	4.4843	3.125	3.125	0.4	2.31214
3.75	0	1.15607	0.843882	3.17919	4.10448	0.869565	2.5	1.13636	5	2.58303	2.46914	2.67176	1.17188	1.48148	5.13834	3.43511	3.17919	1.1811	2.4
4.29448	0.192678	2.32558	0.930233	3.75	4.79705	1.7341	3.47826	1.2	8.39695	2.58303	2.6087	2.7668	1.2	1.49254	5.34351	3.55731	4.10448	1.22699	2.98507
4.8	0.246914	2.51256	1.00503	4	4.79705	1.875	4.92126	1.34529	8.69565	2.61194	2.67176	2.77778	1.2	1.52091	5.55556	3.57143	4.10448	1.25	3.34646
5.21739	0.289017	2.71605	1.11111	4.03587	4.85075	1.875	5.15873	1.50754	8.69565	2.95276	2.77778	2.84091	1.26582	1.54143	5.97303	3.68098	4.21941	1.25	3.47826
5.46875	1.1194	2.73438	1.17188	4.10448	4.93274	2.69058	5.2	1.52091	8.73016	2.98507	2.89017	2.95203	1.39535	1.5625	6.11111	3.73134	4.29688	1.30435	3.6
5.48523	1.14068	2.77778	1.2	4.375	5.13834	2.77778	5.53506	1.68776	8.85609	3.06748	3.13901	2.95203	1.48148	1.6	6.4	3.75	4.375	1.47601	3.66089
5.59701	1.17188	2.8	1.49254	4.42804	5.31496	2.8	5.53506	1.7284	8.85609	3.125	3.2	2.98507	1.49254	1.68776	6.51163	4.33071	4.42804	1.47601	3.69004
5.97015	1.2	2.84091	1.52091	4.47761	5.55556	2.84091	5.59701	1.86047	8.95522	3.33333	3.40909	2.98507	1.52091	1.70455	7.03518	4.42804	4.42804	1.49254	3.69004
6.27306	1.26582	2.89017	1.7341	4.52756	5.72519	2.95203	5.59701	1.86567	8.95522	3.35821	3.54331	3.01508	1.70455	1.84049	7.16049	4.42804	4.8	1.49254	3.73134
6.27306	1.34529	2.98507	1.7341	4.79705	6.08696	2.95203	5.72519	1.92678	9.6	3.37553	3.68098	3.68098	1.7341	1.86047	7.22433	4.47761	4.85075	1.52672	3.75
6.27803	1.39535	3.04183	2.22222	5.34351	6.4	2.98507	5.92885	1.95312	10.0394	3.51562	4.04624	3.93701	1.9685	2.01005	7.38636	5.22388	4.94297	1.58103	3.75
6.49606	1.50754	3.32103	2.45399	5.5336	6.75617	3.05344	7.04801	3.17919	11.3965	3.51759	4.39224	4	2.21402	2.69058	7.42188	5.32319	5	1.5873	3.80228
6.51163	1.5873	3.35821	4.4843	5.55556	7.36196	3.07894	7.2	4.29448	11.6049	3.6	4.42804	4.18605	2.21402	3.33333	7.442	5.48523	5.31496	1.79372	3.86692
6.58106	1.59054	3.37553	5.16562	6.11111	7.46269	3.16206	7.40741	4.58193	12.0603	3.72093	4.42804	4.21941	2.21801	4.04203	7.46269	5.82227	5.52764	2.27638	4.0201
6.71642	1.66667	3.64804	6.32411	6.11411	7.6	3.1746	7.89981	6	12.3314	3.80228	4.47761	4.33387	2.22222	4.8	7.48031	6	5.63257	2.73438	4.03587
6.8	1.70455	3.69004	6.48855	7.32177	7.60456	3.34646	7.97546	7.3913	12.5	3.91304	4.85075	5	2.23881	4.96183	7.74908	6.04651	5.8296	2.8	4.18605
6.93642	1.9084	3.73134	6.74603	7.65432	7.8125	3.35821	8.37209	7.46269	12.9278	3.97727	5.48523	5.00963	2.23881	5.13834	7.74908	6.25	6.25	2.95359	4.19753
7.11462	1.97628	3.75	7.3913	8.20312	8.33333	3.42205	8.98438	7.46269	13.0233	4.01284	5.52764	5.18519	2.31214	5.15873	8.20896	6.4	6.51163	2.98507	4.36508
7.22433	2.55906	4.375	9.44882	8.20896	8.37209	3.51562	9.12548	7.48031	13.6719	4.19847	5.70342	5.21739	2.45399	6.29921	8.43882	6.64062	6.74374	3.17919	4.44444
7.38636	2.58303	4.93274	10.4	8.58896	8.43882	3.66089	9.32836	7.74908	13.8889	4.34783	6.11111	5.49133	3.125	6.875	8.58209	6.66667	7.14286	3.20988	4.54545
7.53769	2.58303	5.21739	10.4478	8.83721	8.64198	3.73134	9.41704	7.74908	13.9241	4.36508	6.34328	5.97015	3.125	6.95652	8.67052	6.66667	7.36196	3.25581	4.58015
7.93651	2.61194	5.51181	10.625	8.86076	8.75	3.79747	9.44444	8.125	14.1791	4.375	6.51163	6	3.13901	8.11808	8.69565	6.95652	7.3913	3.27553	4.64135
8.01527	2.98507	5.5336	10.625	9.04523	8.8632	4	9.54774	8.125	14.7982	4.4843	6.875	6.08365	3.91304	8.11808	8.8	7.03518	7.63359	3.42205	4.6875
8.28516	3.04348	5.55556	11.0701	9.09091	9.04523	4.0201	9.65909	8.39695	15.2	5.18519	7.03125	6.25	4.19847	8.20896	9.81595	8.09249	7.65432	3.51759	4.74308
8.33333	3.06748	5.72519	11.0701	9.12548	10	4.18605	10.4046	8.69565	16.474	5.97303	7.2	6.25	4.34783	8.58209	12.5	9.41704	7.90514	3.97727	4.85075
8.88889	3.2	6.4	11.194	9.2	10.2273	4.19753	10.5485	8.73016	19.6319	8.95954	8.75	6.72646	4.36508	8.75	12.5	12.1387	8	4.44444	4.90798
Supplimentary S1( Table 15 ):-amino acid compoition data of Endangered Species insect
Ala	Cys	Asp	Glu	Phe	Gly	His	Ile	Lys	Leu	Met	Asn	Pro	Gln	Arg	Ser	Thr	Val	Trp	Tyr
2.15054	0	1.96078	0	2.75229	1.83486	0	1.38889	0	3.93701	0	0.917431	1.71821	0.961538	0.662252	2.3622	2.74914	2.63158	0	0.990099
2.64901	0	2.61044	0.687285	3.28947	2.68817	0	1.49254	0	3.93701	0.917431	1.77515	2.06186	1.03093	1.03093	2.3622	3.31126	3.22581	0	1.44231
2.75229	0	2.64901	0.687285	3.40909	3.11111	0	3.5503	0	3.96825	1.18343	2.27273	2.06186	1.03093	1.03093	2.38095	3.43643	3.9604	0	1.5748
3.09278	0	2.75229	0.687285	3.66972	4.60526	0	3.66972	0	4.31034	1.31579	3.60825	2.61438	1.03093	1.03093	2.58621	3.76344	3.97351	0	1.5748
3.11111	0	2.86299	0.877193	3.92157	4.63576	0	3.66972	0	4.58716	1.40056	4.16667	2.64901	1.31579	1.25945	3.73134	3.78007	4	0.687285	1.5873
3.28947	0	3.00429	0.913242	4.16667	4.811	0.653595	6.25	0.803213	5.22388	2.27273	4.20168	2.77778	1.36986	1.43149	4.54545	4	4.10959	0.687285	1.72414
3.43643	0	3.02267	0.913242	4.47761	4.811	0.925926	6.57895	0.858369	5.55556	2.77778	4.28212	3.09278	1.38249	1.54639	5.04202	4.57516	4.12371	0.687285	1.75439
3.43643	0	3.22581	0.921659	4.62963	5.15464	1.03093	6.89655	0.877193	5.88235	3.14961	4.47761	4	1.38889	1.60643	5.09259	5.09259	4.12371	0.746269	1.82648
4.14201	0	3.36538	0.961538	5.51181	5.50459	1.03093	7.08661	1.00756	6.57895	3.14961	4.61847	4.28212	1.49254	1.71674	5.50459	5.36481	4.12371	0.990099	1.82648
5.22388	0.214592	3.40909	1.25945	5.51181	5.55556	1.03093	7.08661	1.02249	7.38636	3.1746	4.63576	4.30108	1.51134	1.82648	6.98925	5.60224	4.12371	1.12045	1.83486
5.31697	0.408998	3.43643	1.3245	5.55556	5.88235	1.13636	7.14286	1.54639	8.33333	3.24074	4.72103	4.58716	1.54639	1.82648	7.21649	5.77984	4.14747	1.38889	1.84332
5.55556	0.537634	3.43643	1.54639	5.88235	7.79843	1.44231	7.28291	1.98675	9.77778	3.44828	4.90798	4.58716	1.5748	1.84332	7.23684	5.82329	4.32692	1.38889	2.23881
5.62249	0.888889	3.43643	1.71674	6.03448	7.92079	1.75439	7.56014	2.22222	10.0592	3.73134	5.22876	4.73373	1.5748	1.92308	7.63889	5.91716	4.49898	1.70455	2.2409
6.04124	0.917431	3.55556	1.80723	6.25	8.33333	1.77515	7.90378	3.22581	10.0917	3.9604	5.47945	4.81928	1.5873	1.9802	7.69231	5.92105	4.50644	1.72414	2.27273
6.22318	0.929422	3.60825	1.84049	6.57895	8.58896	1.82648	8.33333	3.28202	10.4575	4.12371	5.51844	4.8359	1.70455	2.19298	7.7113	5.93047	4.56621	1.90241	2.57732
6.39269	1.03093	3.65297	3.03514	6.76735	8.68347	1.82648	8.59107	3.43643	11.2903	4.57516	5.52995	4.9505	1.71674	2.36686	7.80856	5.93607	4.58716	1.98675	2.75229
6.57895	1.03093	3.65297	3.26797	6.91244	8.83534	1.83486	9.61371	3.43643	11.8066	5.33333	5.70175	5.06912	1.72414	2.8754	7.92079	5.94059	4.61847	2.06186	2.77778
6.80101	1.03093	3.94737	3.47222	7.08155	8.95522	1.83486	10.4575	3.66972	12.0654	5.56201	5.76923	5.15021	1.80723	3.11111	8	5.97015	4.72441	2.15054	3.06748
6.91244	1.13636	3.94737	4	7.10059	9.01288	1.84332	10.5263	4.12371	12.3426	5.70175	5.93607	5.26316	1.82648	3.26797	8.24742	5.99078	4.72441	2.267	3.11111
6.94444	1.18343	4.02265	4.30108	7.30594	9.21053	1.98954	10.596	4.47761	12.4464	5.79345	6.01852	5.31697	1.83486	3.40909	8.24742	6.14035	4.7619	2.28311	3.27456
7.21154	1.31579	4.20168	4.47761	7.30594	9.27835	2.15054	10.9589	4.86111	12.8514	5.91398	6.18557	5.51181	1.84049	3.64146	8.6758	6.25	4.82456	2.28311	3.57247
7.30594	1.38889	4.30108	5.50459	7.52688	9.46746	2.22222	10.9589	5.22876	12.8866	5.93607	6.18557	5.51181	1.90241	3.76344	8.6758	6.25	5.05373	2.30415	3.64807
7.84314	1.40056	4.9505	5.51181	7.73196	9.58904	2.2409	11.2474	6.03448	14.1553	5.99078	6.52921	5.55556	1.96078	4.31034	8.79346	6.29723	5.17241	2.40385	3.76344
7.92079	1.5748	5.17241	5.51181	7.83133	9.58904	2.63158	11.5385	6.57895	14.4231	6.22318	6.93069	5.76923	1.9802	4.62963	9.01288	6.39269	5.54156	2.57511	4.01606
7.95455	1.5748	5.51181	5.55556	7.92079	9.67742	2.77778	11.6466	7.08661	14.4737	6.2249	7.08661	5.93607	2.52101	4.7619	9.03614	6.42202	5.88235	2.61044	4.14201
8.66142	1.5873	5.51181	6.03448	7.97546	9.82368	2.7897	11.8812	7.08661	14.6119	6.25	7.08661	5.93607	2.64901	5.26316	9.13462	6.73077	5.91716	2.63158	4.57516
8.66142	1.72414	5.55556	6.57895	8	10.0962	2.81124	11.9816	7.14286	14.7465	6.39269	7.14286	6.03448	2.66667	5.50459	9.15033	7.21649	6.25	2.65849	4.62963
8.73016	1.83486	5.55556	7.28291	8.06045	10.2362	2.9703	12.0172	8.28402	15.2318	6.74847	7.23684	6.25	2.68817	5.51181	9.27835	9.17431	6.48148	2.66667	6.57895
8.76289	1.96078	7.46269	7.40741	8.24742	10.2362	3.27456	12.0907	8.40336	16.8317	9.27152	7.75862	6.72269	2.77778	5.51181	9.64912	9.48276	6.71642	3.14961	7.21649
9.2437	1.98675	7.63889	7.69231	8.59107	10.3175	3.47648	13.9175	8.52273	19.244	10.9966	9.67742	6.81818	3.5503	10.4167	9.67742	10.2362	7.33945	3.14961	7.21649
9.48276	5.97015	9.46746	7.95455	8.93471	10.3448	3.60825	15.5556	8.7963	19.5876	11.3402	10.0917	8.20896	5.26316	11.194	11.9205	10.2362	8.96359	3.1746	7.56014
12.844	6.94444	12.844	10.0917	9.93377	10.7955	3.73134	15.5914	10.0917	19.9313	11.6838	10.6667	13.1579	5.50459	11.9266	13.7615	10.3175	10.7955	4.57516	7.94702
Supplimentary S1( Table 16 ):-amino acid compoition data of normal homologues of Endangered insect
Ala	Cys	Asp	Glu	Phe	Gly	His	Ile	Lys	Leu	Met	Asn	Pro	Gln	Arg	Ser	Thr	Val	Trp	Tyr
2.75229	0	1.3245	0.684932	1.5873	1.83486	0	1.34228	0	3.93701	0	2.28571	2.05479	0.938967	0.662252	2.3622	3.08219	2.5641	0	1.40845
3.08219	0	1.79641	0.684932	2.75229	2.63158	0	1.50376	0	3.93701	1.14286	2.31214	2.05479	1.0274	1.0274	2.3622	3.31126	3.15789	0	1.5748
3.08219	0	2.38095	0.684932	3.20513	3.11111	0	3.42857	0.452489	3.93701	1.28205	2.38095	2.05479	1.0274	1.0274	2.3622	3.76712	4	0	1.5748
3.11111	0	2.92398	0.873362	3.28767	4.63576	0	3.66972	0.452489	4.2735	1.91781	3.20513	2.35849	1.0274	1.0274	2.5641	3.76712	4.09357	0.571429	1.5748
3.15789	0	2.92398	0.892857	3.46821	4.79452	0.598802	4.7619	0.852878	4.58716	2.31214	3.60825	2.64901	1.31004	1.54639	3.7594	4	4.10959	0.684932	1.7094
3.31126	0	2.98507	0.904977	4.02685	4.79452	0.662252	6.35838	0.873362	4.7619	2.38095	3.77358	2.99401	1.35747	1.55945	4.62428	4.19162	4.10959	0.684932	1.74672
3.42466	0	3.06748	0.904977	4.51128	4.79452	0.943396	6.41026	0.938967	5.12821	2.68456	4.02685	3.09278	1.35747	1.63599	4.65753	4.21053	4.12371	0.684932	1.80995
3.84615	0	3.08219	0.921659	5.18868	5.12821	1.0274	6.60377	1.02249	5.26316	2.83019	4.10959	4	1.38249	1.70576	6.60377	4.48718	4.45205	0.75188	1.80995
4.57143	0	3.28638	0.938967	5.51181	5.55556	1.0274	7.08661	1.16959	5.36913	3.14961	4.47761	4.21053	1.41509	1.74672	6.84211	5.42986	4.60829	1.34228	1.83486
5.26316	0	3.42466	1.54639	5.51181	6.58683	1.15607	7.08661	1.36452	6.0274	3.14961	4.49898	4.46429	1.50376	1.75439	6.85714	5.42986	4.69484	1.36986	1.84332
5.26316	0.194932	3.42466	1.63599	5.51181	6.60377	1.36986	7.08661	1.54639	7.51445	3.14961	4.51128	4.49898	1.54639	1.78571	7.14286	5.52147	4.70348	1.41509	2.25564
5.36913	0.194932	3.46821	1.70576	5.98291	7.86359	1.71429	7.12329	1.98675	9.14286	3.4188	4.79042	4.58716	1.55945	1.80995	7.21649	5.6338	4.72441	1.7094	2.31214
5.45809	0.526316	3.55556	1.75439	5.98802	8.72483	1.74672	7.19178	2.22222	9.77778	3.57143	4.87329	4.69484	1.5748	1.80995	7.38255	5.75342	4.72441	1.7341	2.46575
5.93047	0.641026	3.60825	1.75439	6.10329	8.76712	1.83486	7.53425	2.63158	9.90566	3.7594	4.87329	4.7619	1.5748	1.84332	7.73675	5.80609	4.72441	1.78571	2.57732
5.9611	0.888889	3.61991	2.64901	6.55022	8.77193	1.84332	7.69231	3.00752	11.0526	4.12371	5.29801	4.86189	1.5748	2.34742	8	5.99078	4.80349	1.98675	2.67857
6.25	0.901917	3.61991	2.99401	6.73619	8.92019	1.87793	8.21918	3.42466	11.3772	4.79042	5.36922	4.90405	1.70576	2.81849	8.1448	6.04027	5.11727	2.06186	2.68456
6.33484	1.0274	3.68664	3.02988	6.78733	8.92857	2.08568	9.27152	3.50902	11.7672	5.26316	5.47945	5.06823	1.7094	2.85714	8.1448	6.04288	5.12821	2.08568	3.11111
6.33484	1.0274	3.93013	3.3557	6.78733	8.96686	2.10526	9.27283	3.66972	12.2807	5.33333	5.52995	5.14286	1.7341	2.99401	8.18713	6.11354	5.27057	2.10526	3.11891
6.55022	1.0274	4.00225	3.68421	7.14286	9.02256	2.19178	10.1365	3.76712	12.6706	5.53833	5.67686	5.24017	1.75439	3.11111	8.21918	6.13208	5.35714	2.30415	3.15789
6.57277	1.15607	4.21053	3.7594	7.37327	9.04977	2.22222	10.1796	4.10959	12.7932	5.54371	5.82192	5.26316	1.78571	3.46821	8.21918	6.18337	5.38922	2.62009	3.42857
6.60981	1.36986	4.38356	4	7.40741	9.04977	2.26244	10.4478	4.79042	12.8866	5.67686	5.88235	5.51181	1.81793	3.56164	8.52878	6.23782	5.42986	2.65849	3.47648
7.07547	1.41509	4.46429	5.51181	7.42857	9.27835	2.26244	10.917	5.36913	13.0879	5.88235	5.88235	5.51181	1.83486	3.68421	8.577	6.25	5.42986	2.66667	3.56539
7.37327	1.5748	5.12821	5.51181	7.56646	9.38166	2.38095	11.0429	5.98291	13.5747	5.88235	6.10329	5.51181	1.84049	3.77358	8.75576	6.28571	5.45809	2.72904	3.62473
7.51445	1.5748	5.12821	5.51181	7.73196	9.60699	2.5641	11.0599	7.08661	13.5747	5.99078	6.16438	5.98291	2.01342	4.2735	8.79346	6.34921	5.71429	2.72904	3.77358
7.78443	1.5748	5.18868	5.55556	7.88913	9.61145	2.77186	11.306	7.08661	13.8249	6.23782	6.25	5.99078	2.38095	5.50459	8.98204	6.35838	5.96026	2.77186	3.89864
8.66142	1.7094	5.51181	5.98291	7.89474	9.67742	2.86299	11.3122	7.08661	14.0845	6.43275	7.08661	6.0274	2.39521	5.51181	9.38967	6.76692	6.04027	2.8169	3.96825
8.66142	1.71429	5.51181	6.41026	8	9.71429	3.11891	11.3122	7.69231	14.4105	6.54397	7.08661	6.04027	2.64901	5.51181	9.58904	7.21649	6.76692	3.14961	4.79042
8.66142	1.83486	5.51181	6.84932	8.21918	10.2362	3.31384	11.6071	8	16.0714	6.57277	7.08661	6.33484	2.66667	5.51181	9.60699	9.17431	7.07547	3.14961	5.96026
8.76289	1.98675	7.38255	7.42857	8.56164	10.2362	3.3557	12.6761	8.67052	17.8808	7.28477	7.69231	6.33484	2.73973	6.34921	9.61538	9.40171	7.14286	3.14961	7.05128
9.40171	2.39521	8.27068	8.09249	8.577	10.2362	3.57143	13.9175	9.0411	19.1781	11.3014	10.0917	6.35838	3.15789	6.41026	10.596	10.2362	7.33945	3.61991	7.19178
9.58904	6.01504	9.14286	8.49057	8.90411	10.2564	3.60825	15.2632	9.43396	19.5205	11.6438	10.6667	8.27068	3.42857	10.0671	11.1111	10.2362	8.76712	3.61991	7.53425
10.3175	7.38255	12.844	10.0917	9.93377	10.4046	3.7594	15.5556	15.873	20.2055	11.9863	11.0526	14.7436	4.48718	11.2782	13.7615	10.2362	10.9827	4.19162	7.87671
Supplimentary S1( Table 17 ):-amino acid compoition data of Endangered Species mollusca
Ala	Cys	Asp	Glu	Phe	Gly	His	Ile	Lys	Leu	Met	Asn	Pro	Gln	Arg	Ser	Thr	Val	Trp	Tyr
4.58716	0	0.568182	0.913242	3.4749	3.4749	0	5.60748	0	10.473	3.0888	2.02703	4.05405	0	0.763359	5.47945	2.80374	2.7027	0.772201	0.675676
5.38117	0	0.568182	0.917431	5.60748	5.11364	0	5.68182	0	11.1969	3.40909	2.3166	4.6332	0	0.934579	5.50459	3.81679	3.40909	2.25806	0.966184
5.38117	0	0.568182	0.934579	6.10687	5.38922	0	5.7971	0	12.5806	3.40909	2.90323	5.11364	0.44843	1.1976	5.66038	3.861	3.97727	2.28311	0.966184
5.38117	0	0.598802	1.15607	6.28019	5.68182	0	5.7971	0	12.8	3.97727	3.2	5.11364	0.44843	1.6	5.66038	4.6729	4.12844	2.29358	0.990099
5.50459	0	2.7027	1.34529	6.35838	5.68182	1.15607	5.94059	0	14.5038	4.19162	3.21101	5.11364	0.44843	1.82648	5.78035	4.71698	4.54545	2.29358	1.15607
5.50459	0	2.75229	1.34529	6.43564	8.44595	1.35135	5.9633	0	14.6119	4.9505	3.21101	5.38117	0.458716	1.83486	5.93607	4.71698	4.56621	2.29358	1.37615
5.50459	0	2.75229	1.34529	6.60377	9.66219	1.41509	5.98802	0	14.6789	5.02283	3.24074	5.38117	0.458716	1.93548	6.10687	4.71698	4.79042	2.29358	1.38889
5.55556	0	2.90323	1.35135	6.60377	9.82659	1.41509	6.07477	0	14.7982	5.02283	3.40909	5.38117	0.458716	2.02703	6.13208	4.8	5.18868	2.29358	1.40187
6.08108	0	3.04054	1.35135	6.60377	10.0457	1.41509	6.08108	0	14.7982	5.02283	3.40909	5.38922	0.458716	2.24215	6.28019	4.83092	5.18868	2.31481	1.41509
6.4	0	3.05344	1.36986	6.76329	10.0457	1.44928	6.25	0	14.7982	5.04587	3.40909	5.48387	0.462963	2.24215	6.39269	4.83092	5.18868	2.33645	1.41509
6.45161	0	3.0683	1.36986	6.84932	10.0457	1.44928	6.39269	0	15.5963	5.06757	3.58744	5.50459	0.645161	2.24215	6.43564	4.9505	5.40541	2.4	1.41509
6.75676	0	3.19635	1.36986	6.84932	10.0917	1.48515	6.39269	0.44843	15.6069	5.14019	3.58744	5.50459	0.934579	2.27273	6.54206	5.02283	5.93607	2.47525	1.52672
7.30594	0	3.19635	1.37615	6.84932	10.0917	1.82648	6.39269	0.44843	15.7407	5.18868	3.58744	5.55556	1.01351	2.27273	6.54206	5.02283	5.93607	2.5815	1.6
7.33945	0	3.19635	1.37615	6.88073	10.1351	1.82648	6.72646	0.44843	16.0053	5.18868	3.59281	5.75306	1.15607	2.27273	6.76329	5.20231	6.15135	2.69058	1.79372
8.09854	0	3.2	1.37615	6.88073	10.1449	1.82648	6.87023	0.456621	16.055	5.18868	3.66972	5.93607	1.36986	2.29358	7.09459	5.50459	6.39269	2.69058	1.79372
8.7156	0	3.21101	1.37615	7.00935	10.2804	1.82648	6.88073	0.456621	16.055	5.31401	3.66972	5.93607	1.37615	2.29358	7.33591	5.6498	6.4	2.69058	1.79372
9.09091	0	3.21101	1.37615	7.30594	10.3774	1.83486	6.93642	0.456621	16.8224	5.31401	3.93863	5.93607	1.40139	2.29358	7.38636	5.68182	6.42202	2.7027	1.82648
9.09091	0.322581	3.21101	1.38889	7.40522	10.396	1.83486	7.17489	0.458716	16.8919	5.54654	4.10959	5.93607	1.41509	2.29358	7.38636	5.68182	6.42202	2.73973	1.82648
9.26641	0.337838	3.24074	1.40187	7.43243	10.5023	1.86916	7.17489	0.46729	17.0455	5.78035	4.10959	5.9633	1.41509	2.31481	7.41935	5.93607	6.42202	2.73973	1.82648
9.58084	0.368786	3.27103	1.41509	7.78443	10.5505	1.99144	7.2282	0.471698	17.3653	5.93607	4.10959	5.9633	1.41509	2.40448	7.58224	5.93607	6.54206	2.73973	1.82648
9.58904	0.44843	3.30189	1.41509	7.95455	10.5505	2.24215	7.33945	0.471698	17.3913	5.9633	4.12844	5.9633	1.44928	2.7027	7.78443	5.9633	6.54206	2.75229	1.83486
9.58904	0.44843	3.30189	1.41509	7.95455	10.5505	2.24215	7.33945	0.471698	17.6136	5.9633	4.20561	5.9633	1.44928	2.73973	8.21918	5.9633	6.76329	2.80374	1.83486
9.65909	0.44843	3.30189	1.44928	8	10.687	2.24215	7.54717	0.483092	17.6136	6.08108	4.34783	6.07477	1.48515	2.73973	8.25688	5.9633	6.88073	2.83019	1.83486
9.66184	0.458716	3.38164	1.44928	8.25688	10.7623	2.29008	7.54717	0.483092	17.757	6.42202	4.34783	6.13208	1.52672	2.73973	8.52018	5.98802	6.94444	2.83019	1.83486
9.81308	0.458716	3.38164	1.48515	8.25688	10.7623	2.29358	7.54717	0.49505	17.8218	6.42202	4.45545	6.13208	1.82648	2.75229	8.52018	6.01852	7.09677	2.83019	1.83486
9.82659	0.458716	3.46535	1.52672	8.25688	10.7623	2.29358	7.72201	0.578035	17.8744	6.48148	4.6729	6.13208	1.82648	2.80374	8.52018	6.25	7.17489	2.84091	1.86916
9.90099	0.46729	3.46821	1.6	8.33333	10.8491	2.29358	7.79817	0.645161	17.8899	6.54206	4.71698	6.28019	1.82648	2.83019	8.52273	6.42202	7.17489	2.84091	1.93548
10.3774	0.917431	3.58744	1.88818	8.52018	10.8491	2.29358	7.87037	1.0621	17.8899	6.72646	4.71698	6.28019	1.83486	2.83019	8.7963	6.42202	7.24638	2.89017	2.21272
10.3774	0.925926	3.58744	1.93548	8.52018	10.9677	2.31481	7.95455	2.7027	17.9245	6.72646	4.71698	6.35838	1.86916	2.83019	9.17431	6.72646	7.33945	2.89855	4.54545
10.3774	1.13636	3.58744	2.99401	8.52018	11.0092	2.80374	8.10811	4.54545	17.9245	6.72646	4.72973	6.4	2.84091	2.89017	9.63303	6.72646	7.42574	2.89855	5.01931
10.5023	1.13636	3.65297	3.97727	8.52273	11.1111	2.90323	8.70968	4.54545	17.9245	6.77419	5.34351	6.43564	2.84091	2.89855	10.0917	6.72646	7.62332	2.99401	5.06757
10.628	1.13636	3.66972	3.97727	8.7156	11.1111	3.2	8.8	4.54545	18.2648	6.88073	5.78035	6.75676	2.84091	2.89855	10.5505	6.75676	7.63359	3.04054	5.11364
10.687	1.1976	3.73832	3.97727	9.03226	11.2	4.39189	10.5023	4.79042	18.2648	7.2	5.93607	6.87023	2.99401	2.9703	11.2	7.09677	8.09249	3.05344	5.11364
12.1495	1.5444	5.40541	8.49421	9.12162	11.215	5.01931	11.0092	5.79151	18.2648	7.63359	5.9633	7.47664	5.01931	3.861	12.1622	7.43243	8.44595	3.40909	5.38922
Supplimentary S1( Table 18 ):-amino acid compoition data of normal homologues of Endangered mollusca
Ala	Cys	Asp	Glu	Phe	Gly	His	Ile	Lys	Leu	Met	Asn	Pro	Gln	Arg	Ser	Thr	Val	Trp	Tyr
5.38117	0	0.568182	0.913242	3.4749	3.861	0	3.63636	0	10.8108	2.84091	2.02703	3.71622	0	1.70455	4.54545	3.63636	2.7027	0.772201	0.675676
5.38117	0	0.60241	0.980392	5.45455	5.68182	0	5.55556	0	11.1969	2.84091	2.3166	4.6332	0.44843	1.70455	5.31401	3.861	4.21687	2.28311	0.990099
5.38117	0	1.13636	1.13636	6.39269	5.68182	0	5.94059	0	12.5786	3.01205	2.83019	5.04587	0.44843	1.80723	5.47945	3.96825	4.41176	2.29358	1.13636
5.9633	0	1.13636	1.25786	6.43564	5.68182	0	6.0241	0	14.2857	3.0888	3.01205	5.11364	0.44843	1.81818	5.66038	4.71698	4.54545	2.29358	1.36986
5.9633	0	1.5873	1.34529	6.60377	6.0241	1.35135	6.08108	0	14.6119	3.40909	3.21101	5.34591	0.458716	1.82648	5.66038	4.71698	4.54545	2.29358	1.37615
5.97484	0	2.7027	1.34529	6.60377	8.78378	1.41509	6.2201	0	14.7059	4.10959	3.40909	5.38117	0.458716	1.88679	5.66038	4.71698	4.54545	2.41546	1.41509
6.08108	0	2.72727	1.34529	6.60377	9.31373	1.41509	6.25	0	14.7982	4.72973	3.40909	5.38117	0.458716	1.96078	5.93607	4.71698	4.56621	2.45098	1.41509
6.42202	0	2.75229	1.35135	6.60377	9.56938	1.41509	6.25	0	14.7982	4.83092	3.40909	5.38117	0.568182	2.02703	5.93607	4.83092	5.18868	2.47525	1.41509
6.75676	0	2.84091	1.35135	6.69856	9.62188	1.41509	6.25	0.44843	14.7982	4.9505	3.58744	5.39216	0.628931	2.24215	6.13208	4.9505	5.18868	2.51572	1.41509
7.30594	0	2.87081	1.36986	6.76329	9.65909	1.43541	6.25	0.44843	15.5963	5.02283	3.58744	5.42169	0.793651	2.24215	6.25	5.02283	5.18868	2.6066	1.43541
7.35294	0	2.94118	1.36986	6.84932	10.0457	1.47059	6.28019	0.44843	16.055	5.02283	3.58744	5.50459	0.980392	2.24215	6.39269	5.02283	5.18868	2.69058	1.44928
8.49558	0	3.00885	1.36986	6.84932	10.0457	1.48515	6.39269	0.456621	16.0901	5.02283	3.66972	5.50459	1.01351	2.27273	6.43564	5.02283	5.40541	2.69058	1.47059
8.6758	0	3.04054	1.36986	7.14286	10.1351	1.70455	6.39269	0.456621	16.3636	5.04587	3.66972	5.68182	1.36986	2.29358	6.69856	5.11364	5.68182	2.69058	1.5873
9.03614	0	3.14465	1.37615	7.30594	10.1449	1.81818	6.39269	0.456621	16.4773	5.18868	3.99035	5.68182	1.36986	2.29358	7.09459	5.26316	5.93607	2.7027	1.79372
9.13242	0	3.19635	1.37615	7.30594	10.3175	1.82648	6.39269	0.471698	16.8919	5.18868	4.10959	5.71199	1.36986	2.29358	7.14286	5.42169	6.19469	2.72727	1.79372
9.26641	0	3.19635	1.41509	7.35294	10.3774	1.82648	6.72646	0.471698	16.9725	5.18868	4.10959	5.74163	1.41509	2.38095	7.28882	5.50459	6.39269	2.73973	1.79372
9.58904	0	3.19635	1.41509	7.38636	10.396	1.82648	7.1601	0.471698	17.0455	5.18868	4.10959	5.93607	1.41509	2.47788	7.33591	5.51891	6.69856	2.73973	1.81818
9.65909	0.289622	3.21101	1.41509	7.43243	10.5023	1.82648	7.17489	0.471698	17.0455	5.26316	4.10959	5.93607	1.41509	2.7027	7.38636	5.66038	6.76329	2.73973	1.82648
9.90099	0.337838	3.21101	1.41509	7.44972	10.5505	1.93237	7.17489	0.478469	17.3516	5.27755	4.30622	5.93607	1.41509	2.73973	7.38636	5.68182	6.84932	2.73973	1.82648
10.0457	0.44843	3.30189	1.43541	7.83133	10.5505	1.9469	7.33945	0.483092	17.3516	5.68182	4.34783	5.93607	1.43202	2.73973	7.38636	5.68182	6.88073	2.83019	1.82648
10.2273	0.44843	3.30189	1.44928	7.95455	10.6918	2.24215	7.33945	0.49505	17.6136	5.93607	4.45545	6.13208	1.43541	2.73973	7.83133	5.68182	7.17489	2.83019	1.82648
10.2273	0.44843	3.30189	1.48515	8.25688	10.7623	2.24215	7.54717	0.568182	17.8218	6.08108	4.54545	6.13208	1.48515	2.73973	8.21918	5.93607	7.17489	2.83019	1.83486
10.3774	0.458716	3.30189	1.5873	8.25688	10.7623	2.24215	7.54717	1.25786	17.8744	6.36364	4.71698	6.13208	1.81818	2.83019	8.49057	5.93607	7.2327	2.83019	1.83486
10.3774	0.458716	3.38164	1.81818	8.52018	10.7623	2.28311	7.54717	1.27112	17.9245	6.37255	4.71698	6.13208	1.82648	2.83019	8.52018	5.9633	7.33945	2.84091	2.20126
10.3774	0.458716	3.46535	1.83486	8.52018	10.8491	2.29358	7.54717	1.36986	17.9245	6.42202	4.71698	6.28019	1.82648	2.83019	8.52018	5.9633	7.33945	2.84091	2.30088
10.3774	0.568182	3.58744	1.86645	8.52018	10.8491	2.29358	7.72201	2.7027	17.9245	6.42202	4.71698	6.34921	1.93237	2.83019	8.52018	6.37255	7.42574	2.84091	5.01931
10.5263	0.60241	3.58744	2.84091	8.52273	10.8491	2.29358	7.77027	4.54545	17.9245	6.72646	4.72973	6.39269	2.84091	2.84091	8.7156	6.72646	7.62332	2.84091	5.06757
10.628	1.13636	3.58744	2.84091	8.52273	10.9589	2.38095	8.25688	5.11364	18.1818	6.72646	5.11364	6.43564	2.84091	2.87081	8.7156	6.72646	7.76256	2.87081	5.11364
11.1111	1.13636	3.65297	3.01205	8.7156	10.9589	2.83019	8.49057	5.11364	18.2648	6.72646	5.55556	6.75676	2.84091	2.89855	8.82353	6.72646	7.93651	3.01205	5.11364
11.3636	1.13636	3.65297	3.97727	9.12162	11.0092	4.39189	10.5023	5.42169	18.2648	7.14286	5.93607	6.81818	3.01205	2.9703	9.63303	6.75676	8.18182	3.04054	5.11364
11.8182	1.1583	5.01931	8.49421	9.74843	12.7273	5.01931	11.2745	5.79151	19.2771	7.2327	6.37255	8.18182	5.01931	4.2471	12.1622	7.43243	8.78378	3.1746	5.42169

## Sheet: sheet1
Supplimentary S1( Table 19 ):-% of Hydrophobicity data of Endangered fungi,insect,invertibrate,mollusca,arthopoda and amphebian						Supplimentary S1( Table 20 ):-% of Hydrophobicity data of normal homologues of Endangered fungi,insect,invertibrate,mollusca,arthopoda and amphebian
% Of Hydrophobicity (Mollusca)	% OF Hydrophobicity (Insect)	% OF Hydrophobicity (amphebian)	% OF Hydrophobicity (arthopoda)	% OF Hydrophobicity (Invertibrate)	% OF Hydrophobicity (Fungi)	% Of Hydrophobicity	% OF Hydrophobicity	% OF Hydrophobicity	% OF Hydrophobicity	% OF Hydrophobicity	% OF Hydrophobicity
42.86	42.06	56.7	41.55	61.5	38.29	59.63	41.73	56.84	41.55	61.5	38.61
55.07	41.73	58.96	56.93	61.14	44.49	59.17	41.73	57.8	56.2	59.31	45.3
56.82	36.69	39.64	60.65	62.89	39.92	59.31	37.14	39.37	60.27	62.89	37.95
57.2	43.1	27.22	59.36	72.23	43.11	58.45	43.59	26.88	61	72.92	42.92
57.34	52.29	37.08	61.31	69.23	42.29	57.43	52.69	37.31	60.78	69.23	40
57.39	46.59	54.62	59.82	57.14	45.12	58.72	46.24	54.48	59.82	57.14	44.71
57.39	41.73	55	58.8	55.47		57.85	41.73	35.02	58.69	56.72
57.43	58.08	36.98	59.64	56.93		57.85	57.53	35.82	59.64	55.47
57.85	55.83	55.32	61.11	60.65		57.85	55.75	55.68	59.36	60.27
57.85	57.39	53.77	60.83			63.5	57.53	53.77	60.17
57.85	33.33	36.23	62.3			59.12	32.43	36.53	63.35
58.08	57.39	52.72	41.9			61.79	57.88	53.33	35.71
58.26	36.84	53.74	60.75			61.79	37.18	54.42	59.36
58.26	25.69	55.95	42.31			61.79	25.69	55.6	39.42
58.45	56.7	37.39	61.29			62.5	56.7	37.39	61.29
58.8	52.15	36.7				62.73	52.11	36.9
59.63	57.18	43.51				62.7	56.03	43.51
60.55	40.37	53.13				61.39	35.71	53.13
60.73	42.13	56.6				57.95	42.18	56.65
60.75	44.54	38.55				62.2	44.11	38.4
61.19	58.06	28.13				57.95	59.28	28.13
61.35	56.58	61.98				60.27	56.77	55.83
61.39	56.22	49.34				57.39	55.36	53.36
61.64	52.44	53.58				61.79	52.44	56.79
61.79	58.42	44.86				57.83	56.25	42.86
61.79	57.99					60.27	59.28
61.79	58.17					61.84	58.22
61.84	58.45					54.73	58.53
61.85	35.82					60.73	36.09
63.36	56.29					42.86	58.28
63.55	56.22					61.64	56.08
Supplimentary S1( Table 21 ):-% of Hydrophilicity data of Endangered fungi,insect,invertibrate,mollusca,arthopoda and amphebian.						Supplimentary S1( Table 22 ):-% of Hydrophilicity data of normal homologues of Endangered fungi,insect,invertibrate,mollusca,arthopoda and amphebian.
% OF Hydrophilicity (Mollusca)	% OF Hydrophilicity (Insect)	% OF Hydrophilicity (Amphebian)	% OF Hydrophilicity (Arthopoda)	% OF Hydrophilicity (Invertibrate)	% OF Hydrophilicity (Fungi)	% OF Hydrophilicity	% OF Hydrophilicity	% OF Hydrophilicity (Amphebian)	% OF Hydrophilicity (Arthopoda)	% OF Hydrophilicity (Invertibrate)	% OF Hydrophilicity (Fungi)
20	34	20	36	17	40	19	35	19	36	17	41
21	35	21	31	21	33	20	35	22	31	22	33
22	41	43	20	20	44	22	40	42	21	20	42
22	34	54	19	9	38	22	33	54	19	8	37
24	30	45	21	19	35	24	29	46	22	19	34
21	32	22	20	27	37	21	32	23	20	27	38
20	35	22	23	33		20	35	23	23	31
20	25	45	18	31		20	25	46	18	33
20	23	19	18	20		20	23	19	19	21
19	25	21	19			21	25	21	19
20	40	45	19			19	39	45	18
20	24	22	40			21	23	23	46
20	42	21	18			20	43	21	19
20	58	22	39			20	58	22	43
21	21	42	18			19	21	42	18
18	35	45				17	35	45
18	20	38				19	22	38
21	42	23				21	46	23
26	40	22				24	39	22
21	35	48				20	35	41
25	23	54				24	22	54
21	25	22				20	24	25
25	22	30				25	22	24
20	34	20				20	34	19
24	24	36				25	22	39
19	23					21	22
20	22					20	24
19	22					19	22
20	37					20	36
38	26					38	25
19	23					19	22
Supplimentary S1( Table23 ):-Isoelectric point data of Endangered fungi,insect,invertibrate,mollusca,arthopoda and amphebian.						Supplimentary S1( Table24 ):-Isoelectric point data of normal homologues of Endangered fungi,insect,invertibrate,mollusca,arthopoda and amphebian.
Isoelectric point (Mollusca)	Isoelectric point (Insect)	Isoelectric point (Amphebian)	Isoelectric point (Arthopoda)	Isoelectric point (Invertibrate)	Isoelectric point (fungi)	Isoelectric point	ISOELECTRIC POINT	Isoelectric point	ISOELECTRIC POINT	Isoelectric point	ISOELECTRIC POINT
9	8.2	6	7.4	5.2	9	5.2	8.9	6.3	7.4	5.2	5.5
5.5	8.9	9.9	10.1	7.9	5.2	5.2	8.9	9.7	10.2	9	5.3
4.5	4.5	6	4.8	10	7.1	4.8	4.5	6.3	4.8	10	5.7
4.5	5.2	9.5	4.8	5.2	7.8	4.5	5.2	9.5	5.2	5.2	7.4
5.3	9.4	7.3	5.3	5.9	8.3	5.3	9.4	8.6	4.8	5.9	7.8
5.2	8.2	6.2	4.8	10.3	5.1	5.2	8.2	6.4	4.8	10.3	5.2
5.2	8.9	6	4.4	10.2		5.2	8.9	6.5	4.4	10
5.2	7.9	7.6	5.2	10.1		5.2	8.6	7.9	5.2	10.2
5.2	5.8	6.8	4.5	4.8		5.2	5.9	6.6	5.1	4.8
5.2	8.6	7.4	4.8			7.4	7.9	7.4	4.8
5.7	8.5	7.6	5.2			6.1	8.5	8.2	5.2
5.3	7.9	6	10.9			5.3	8.6	8	10.8
5.3	8.7	7.4	4.5			5.3	9.4	8	4.8
5.3	4	6.6	10.8			5.3	4	6.4	11.3
5.3	5.9	8.2	4.5			6.3	5.9	8.4	4.5
4.5	5.7	8.3				4.6	5.7	8.4
4.3	5.8	8.4				6.3	5.7	8.4
5.3	11.3	6.9				5.3	10.8	6.9
9.4	8	6.3				9.5	6.2	6.1
5.3	8.1	4.7				5.8	8.8	4.7
9.3	4.8	9				9.5	5.1	9
5.6	5.2	10.1				5.9	4.5	9
9.3	5.7	4.5				9.3	6	4.4
5.6	5.3	6.3				5.3	5.3	6.2
9.3	5.1	8.6				9.8	5.1	8.8
5.6	4.5					6	5.1
5.3	4.5					5.6	6
8.5	4.5					8.5	4.5
5.6	8.5					5.6	8.1
5.5	4.3					5.8	4.8
5.6	5.6					5.6	5.6
